# Supplementary material for: Experimental and theoretical insights into palladium-mediated polymerization of para-N,N-disubstituted aminostyrene
Source: Royal Society of Chemistry journal article supplement (doi:10.1039/d3dt03146b), 2023-01-01
Supplement: d3dt03146b1.pdf [file d3dt03146b1.pdf]

**Supporting Information for:**

**Experimental and Theoretical Insights into Palladium-Mediated Polymerization of *Para-N,N*-disubstituted Aminostyrene**

Chi Shing Cheung<sup>#</sup>, Zonglin Qiu<sup>#</sup>, Donghui Li, Huiyun Deng, Handou Zheng\*, and  
Haiyang Gao\*

School of Materials Science and Engineering, PCFM Lab, GD HPPC Lab, Sun Yat-sen  
University, Guangzhou 510275, China.

\*Corresponding author. Fax: +86-20-84114033. Tel.: +86-20-84113250.

Email: Gao H.: [gaohy@mail.sysu.edu.cn](mailto:gaohy@mail.sysu.edu.cn)

Contents:

S1. Experiments

S1.1 Materials.

S1.2 Measurements.

S1.3 Polymerization procedures

S2. Polymerization results

S3. Characterization of polymer samples

S4. Computational details.

S5. References

## **S1. Experiments**

### **General Methods**

All manipulations involving air- and moisture sensitive compounds were carried out under an atmosphere of dried and purified nitrogen with standard vacuum-line, Schlenk, or glovebox techniques.

#### **S1.1 Materials.**

Anhydrous dichloromethane was distilled from P<sub>2</sub>O<sub>5</sub> under nitrogen. Anhydrous tetrahydrofuran and methanol were distilled from CaH<sub>2</sub> under nitrogen. Diacetyl and substituted anilines purchased from Energy Chemical and used as received. Methyltriphenylphosphonium bromide, potassium tertbutoxide, *para*-dimethylaminobenzaldehyde, *para*-diethylaminobenzaldehyde and *para*-diphenylaminobenzaldehyde were also purchased from Energy Chemical and used without purification. All  $\alpha$ -diimine palladium complexes were prepared by the reaction of Pd(COD)MeCl with the corresponding  $\alpha$ -diimine ligand according to the previously reported method.<sup>1,2</sup> Other commercially available reagents were purchased and used without purification.

The commercial polystyrene ( $M_n = 139000$ , PDI = 2.07, PS) was directly purchased from SINOPEC.

### **Synthesis and characterization of cationic $\alpha$ -diimine palladium complexes**

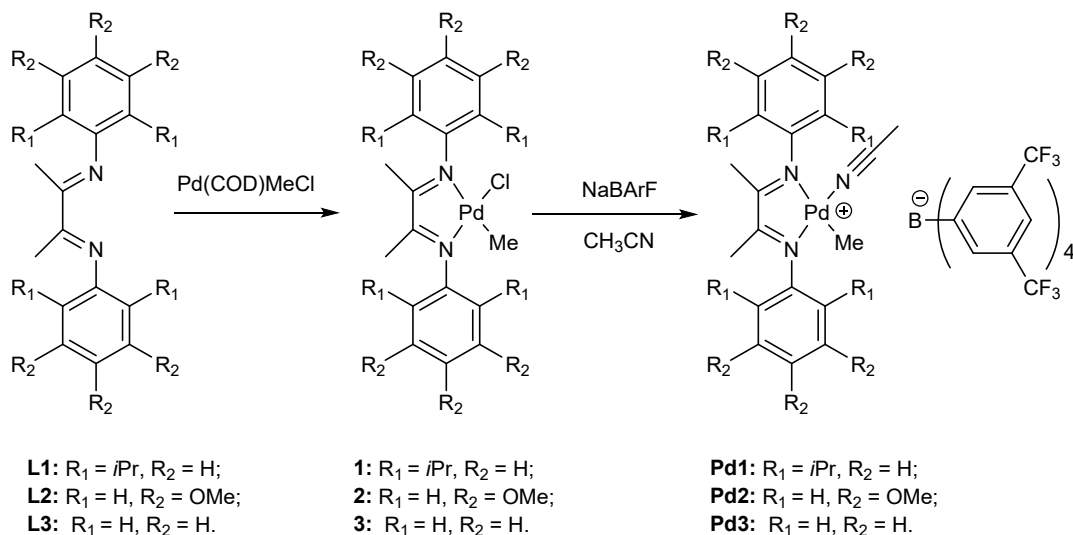

**Scheme S1.** Synthetic route of cationic  $\alpha$ -diimine palladium complexes

### **Pd1, Pd2 and Pd3.**

The  $\alpha$ -diimine palladium complexes were synthesized by the reaction of Pd(COD)MeCl with the corresponding  $\alpha$ -diimine ligand. Then the corresponding  $\alpha$ -diimine palladium complexes were treated with NaBARF to obtain the cationic  $\alpha$ -diimine palladium complexes (Scheme S2).<sup>1,2</sup>

**Pd1:**  $^1H$  NMR (400 MHz,  $CDCl_3$ ),  $\delta$  (ppm): 7.70 (s, 8H, Ar-**H** in BARF<sup>-</sup>), 7.54 (s, 4H, Ar-**H** in BARF<sup>-</sup>), 7.35-7.30 (m, 6H, Ar-**H**), 2.84 (m, 4H, **CH**( $CH_3$ )<sub>2</sub>), 2.18 (s, 6H, =**CCH**<sub>3</sub>), 1.76 (s, 3H, **CNCH**<sub>3</sub>), 1.34, 1.21 (t, 24H, **C**( $CH_3$ )<sub>2</sub>), 0.53 (s, 3H, Pd**CH**<sub>3</sub>).

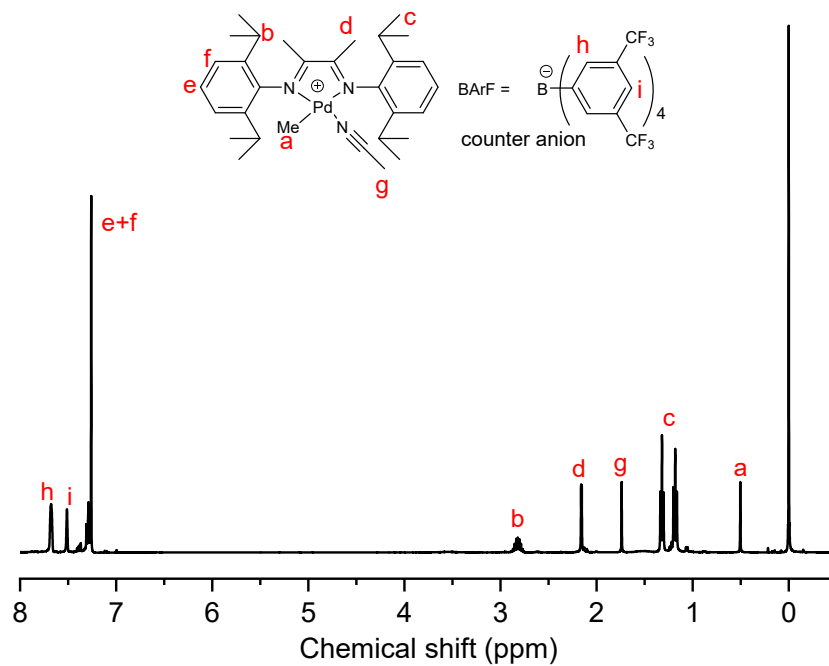

**Figure S1.** <sup>1</sup>H NMR spectrum of **Pd1**.

**Pd2:** <sup>1</sup>H NMR (400 MHz, CDCl<sub>3</sub>),  $\delta$  (ppm): 7.68 (s, 8H, Ar-**H** in BArF<sup>-</sup>), 7.52 (s, 4H, Ar-**H** in BArF<sup>-</sup>), 6.13 (s, 2H, Ar-**H**), 6.03 (m, 2H, Ar-**H**), 3.88, 3.79 (d, 18, O**CH**<sub>3</sub>), 2.21, 2.18 (s, 6H, =C**CH**<sub>3</sub>), 2.01 (s, 3H, CN**CH**<sub>3</sub>), 0.67 (s, 3H, Pd**CH**<sub>3</sub>).

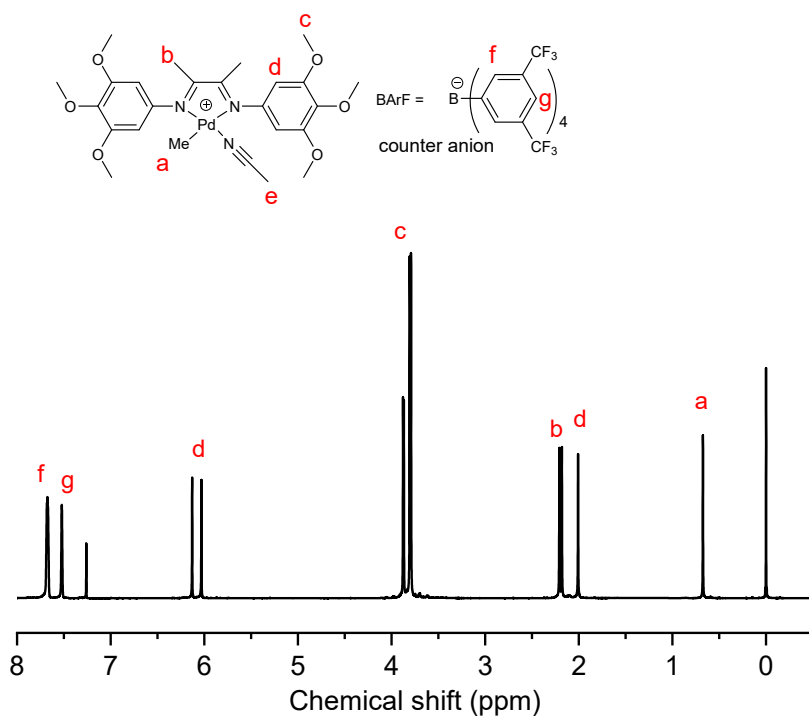

**Figure S2.**  $^1\text{H}$  NMR spectrum of **Pd2**.

**Pd3:**  $^1\text{H}$  NMR (400 MHz,  $\text{CDCl}_3$ ),  $\delta$  (ppm): 7.70 (s, 8H, Ar-*H* in  $\text{BArF}^-$ ), 7.53 (s, 4H, Ar-*H* in  $\text{BArF}^-$ ), 7.50-7.27 (m, 6H, Ar-*H*), 6.92-6.80 (dd, 4H, Ar-*H*), 2.18, 2.14 (s, 6H,  $=\text{CCH}_3$ ), 1.85 (s, 3H,  $\text{CNCH}_3$ ), 0.54 (s, 3H,  $\text{PdCH}_3$ ).

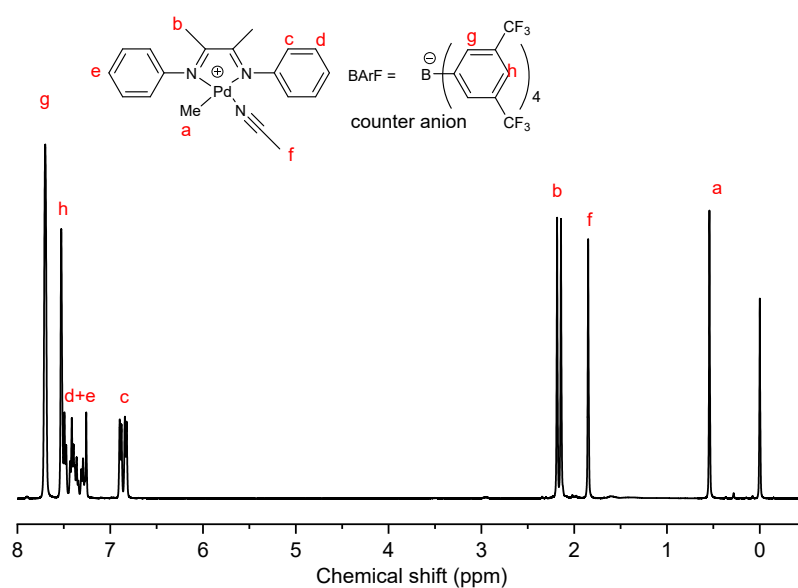

**Figure S3.**  $^1\text{H}$  NMR spectrum of **Pd3**.

## Synthesis and characterization of *para*-*N,N*-disubstituted aminostyrene

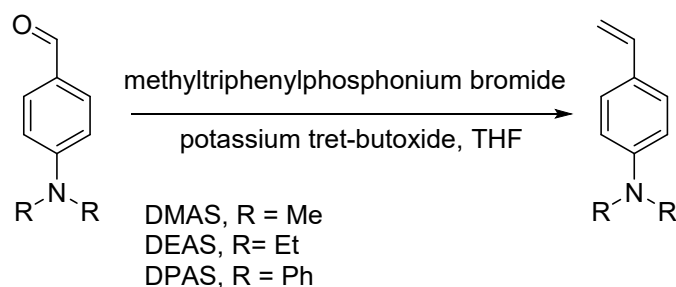

**Scheme S2.** Synthetic route of DMAS, DEAS, and DPAS.

DMAS, DEAS, and DPAS were synthesized by Wittig reactions according to the reported literatures.<sup>1,3</sup> All products after dehydration and purification were stored in brown ampules under dry nitrogen.

DMAS, <sup>1</sup>H NMR (400 MHz, CDCl<sub>3</sub>),  $\delta$  (ppm): 7.33-7.25 (m, 2H, Ar-H), 6.70-6.65 (m, 2H, Ar-H), 6.65-6.57 (q, 1H, CH=CH<sub>2</sub>), 5.58-5.49 (dd, 1H, CH=CH<sub>2</sub>), 5.04-4.97 (dd, 1H, CH=CH<sub>2</sub>), 2.93 (s, 6H, N(CH<sub>3</sub>)<sub>2</sub>).

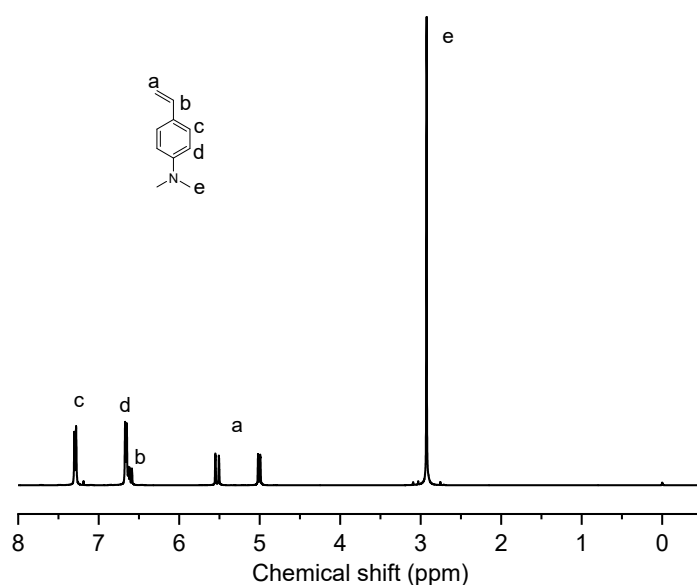

**Figure S4.** <sup>1</sup>H NMR spectroscopy of DMAS.

DEAS,  $^1\text{H}$  NMR (400 MHz,  $\text{CDCl}_3$ ),  $\delta$  (ppm): 7.36-7.21 (m, 2H, Ar-H), 6.70-6.59 (m, 2H, Ar-H), 6.58 (s, 1H,  $\text{CH}=\text{CH}_2$ ), 5.57-5.44 (dd, 1H,  $\text{CH}=\text{CH}_2$ ), 5.02-4.91 (dd, 1H,  $\text{CH}=\text{CH}_2$ ), 3.36 (q, 4H,  $\text{N}(\text{CH}_2)_2$ ), 1.16 (t, 6H,  $(\text{CH}_3)_2$ ).

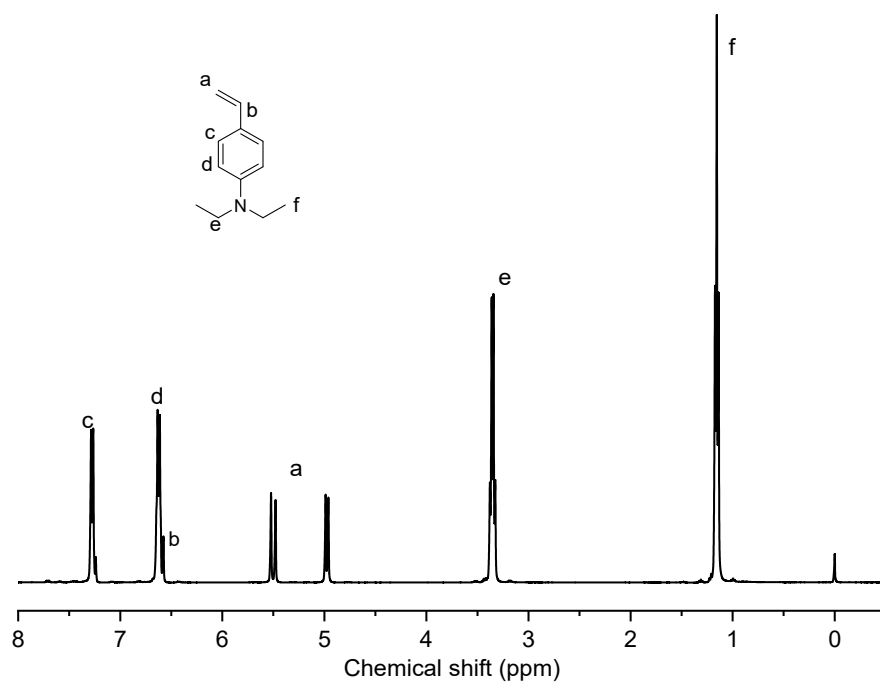

**Figure S5.**  $^1\text{H}$  NMR spectroscopy of DEAS.

DPAS,  $^1\text{H}$  NMR (400 MHz,  $\text{CDCl}_3$ ),  $\delta$  (ppm): 7.33-6.94 (m, 14H, Ar-H), 6.72-6.60 (q, 1H,  $\text{CH}=\text{CH}_2$ ), 5.69-5.57 (dd, 1H,  $\text{CH}=\text{CH}_2$ ), 5.19-5.10 (dd, 1H,  $\text{CH}=\text{CH}_2$ )

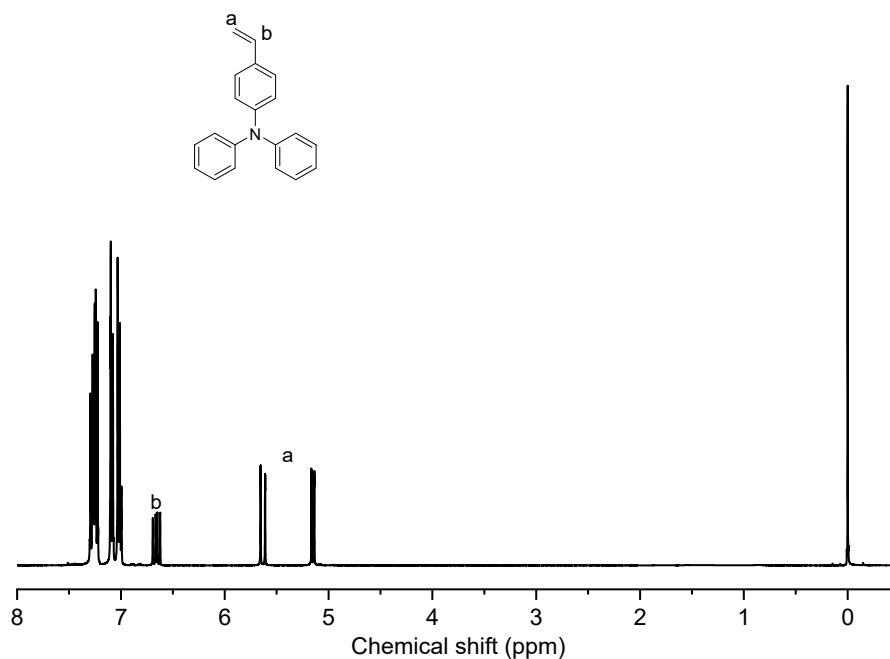

**Figure S6.** <sup>1</sup>H NMR spectroscopy of DPAS.

### Synthesis and characterization of DMAS-treated palladium complexes

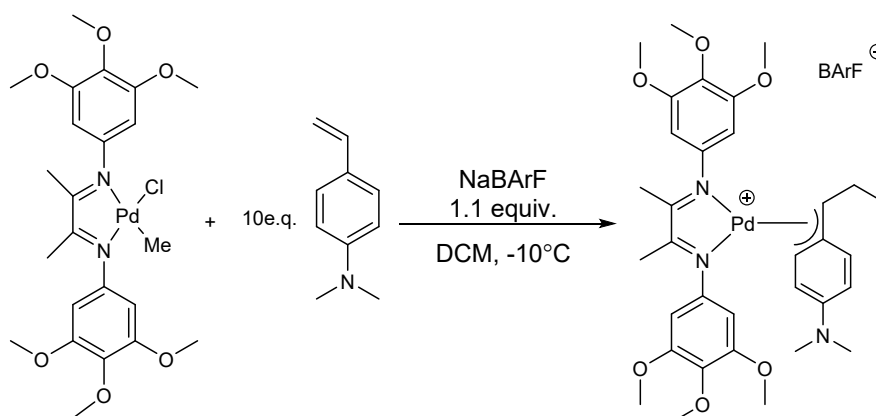

**Scheme S3.** Synthetic route of Pd-DMAS complex.

The Pd-DMAS complex was synthesized referring to previous report,<sup>1,4</sup> the detailed synthetic process was shown as follows.  $\alpha$ -Diimine palladium complex **2** (1.0 equiv, 0.2 mmol, 0.115 g), and NaBARF (1.1 equiv, 0.22 mmol, 0.196g) were added to a Schlenk tube and stir for 30min. DMAS (10.0 equiv., 2 mmol, 0.30 mL) and CH<sub>2</sub>Cl<sub>2</sub> (15 mL) were



subsequently added, and the reaction mixture was then stirred for 12 h at -10 °C. After filtration, the filtrate was evaporated to 3 mL under vacuum and then 50 mL hexane was added. After filtered and washed with hexane (3 × 10 mL), the complex was precipitated as a dark red solid in 84 % yield.

**Pd-DMAS**, <sup>1</sup>H NMR (400 MHz, CDCl<sub>3</sub>), δ (ppm): 7.68 (s, 8H, Ar-H in BArF<sup>-</sup>), 7.53 (s, 4H, Ar-H in BArF<sup>-</sup>), 7.21 (d, 1H, γ'), 6.55 (d, 1H, γ), 6.48 (d, 1H, β'), 6.25 (s, 2H, Ar-H in ligand), 5.52 (s, 2H, Ar-H in ligand), 4.0-3.61 (m, 18H, OMe in ligand), 2.78 (s, 6H, N(CH<sub>3</sub>)<sub>2</sub>), 2.72 (dd, 1H, c), 2.18 (s, 3H, CH<sub>3</sub> in ligand), 2.01 (s, 3H, CH<sub>3</sub> in ligand), 1.28 (d, 1H, H<sub>b-1</sub>), 0.77 (t, 3H, CH<sub>3</sub>), 0.64 (m, 1H, H<sub>b-1</sub>).

### S1.2. Measurements.

NMR spectroscopy of all samples were carried out on Bruker 400 MHz instruments in CDCl<sub>3</sub> using TMS as a reference. GPC analyses of the molecular weights and molecular weight distributions ( $PDI = M_w/M_n$ ) of the polymers were performed on a Waters Breeze 2 GPC chromatograph equipped with a differential refractive-index detector. Tetrahydrofuran (THF) used as the eluent at a flow rate of 1.0 mL/min. DSC analysis of polymers was conducted with a Perkin-Elmer DSC-4000 system. The DSC curves were recorded as second heating curves from 30 to 200 °C at a heating rate of 10 °C/min and a cooling rate of 10 °C/min. Thermogravimetric analysis (TGA) was carried out with a NETZSCH TG209F3 thermal gravimetric analyzer at a heating rate of 20 °C/min from

50 to 800 °C under a nitrogen flow. MALDI-TOF spectroscopy was performed on a Bruker ultrafleXtreme. PL spectra were measured on a GANGDONG F-380 spectrofluorometer, the tested sample was entry 7 from table 2, and the concentration of its THF solution was diluted gradually from 1 mg/mL to 0.00125 mg/mL. The water surface contact angle (WSCA) test was conducted on a goniometer (Krüss, DSA100S)

### **S1.3. Polymerization Procedure.**

The typical polymerization procedure (using the polymerization of DMAS with **Pd2** as an example) is described. A round-bottom Schlenk flask with a stirring bar was heated for 3h at 150 °C under vacuum. After cooling to room temperature, fill with dry nitrogen. 0.54 mL of DMAS (3.5mmol) and 9 mL of CH<sub>2</sub>Cl<sub>2</sub> were injected into the round-bottom Schlenk flask at 30 °C. The polymerization was started by the addition of 1 mL of **Pd2** solution in CH<sub>2</sub>Cl<sub>2</sub> (2μmol) into the round-bottom Schlenk flask at 30 °C. The reaction mixture was continuously stirred at a polymerization temperature of 30 °C. After a certain polymerization time, the reaction was terminated by injected methanol (1mL) containing a small amount of aqueous NaOH solution (0.1%). Then the quenched mixture was pouring the into 150 mL of methanol containing a small amount of aqueous NaOH solution (0.1%) and stirred for 0.5 h at room temperature to precipitate polymers. The resulting precipitated polymers were collected

and treated by filtration, washed with methanol and water. Dried in a vacuum at 40 °C to a constant weight. The monomer conversion was determined by gravimetry.

## S2. Polymerization results

**Table S1.** Polymerization of DMAS using **Pd2** at different times. <sup>a</sup>

| entry | time (min) | yield (mg) | conv. (%) | TOF (mol/mol Pd h) | $M_n^b$ | PDI <sup>b</sup> |
|-------|------------|------------|-----------|--------------------|---------|------------------|
| 1     | 2          | 66.9       | 12.9      | 6820               | 6100    | 1.59             |
| 2     | 5          | 167.4      | 32.3      | 6820               | 5700    | 1.60             |
| 3     | 10         | 325.1      | 62.7      | 6627               | 5300    | 1.54             |
| 4     | 20         | 405.9      | 78.3      | 4140               | 4700    | 1.59             |
| 5     | 30         | 437.0      | 84.3      | 2970               | 4100    | 1.62             |
| 6     | 45         | 439.6      | 84.8      | 1990               | 4000    | 1.64             |
| 7     | 60         | 444.3      | 85.7      | 1510               | 4000    | 1.61             |

<sup>a</sup> Polymerization conditions: 2  $\mu$ mol of **Pd2**,  $[M]_0/[Pd]_0 = 1750$ , 10 mL of  $CH_2Cl_2$ ,  $T = 30$  °C. <sup>b</sup> Molecular weight and PDI were determined by GPC using tetrahydrofuran as eluent.

**Table S2.** Polymerization of DMAS using **Pd2** with BQ <sup>a</sup>

| entry | $[BQ]_0/[Pd]_0$ | yield (mg) | conv. (%) | TOF (mol/mol Pd h) | $M_n^b$ | PDI <sup>b</sup> |
|-------|-----------------|------------|-----------|--------------------|---------|------------------|
| 1     | 5               | 439.3      | 84.7      | 2984               | 3900    | 1.61             |

<sup>a</sup> Polymerization conditions: 2  $\mu$ mol of Pd2, 30 min,  $T = 30$  °C, 10 mL of  $CH_2Cl_2$ . <sup>b</sup> Molecular weight and PDI were determined by GPC using tetrahydrofuran as eluent.

ss

**Table S3.** Polymerization of DMAS by **Pd2** in the presence of methanol at different times <sup>a</sup>

| entry | $[MeOH]_0/[Pd]_0$ | time (min) | yield (mg) | conv. (%) | TOF (mol/mol Pd h) | $M_n^b$ | PDI <sup>b</sup> |
|-------|-------------------|------------|------------|-----------|--------------------|---------|------------------|
| 1     | 1750              | 5          | 46.2       | 8.9       | 1883               | 4000    | 1.18             |
| 2     | 1750              | 10         | 143.9      | 27.8      | 2932               | 3900    | 1.28             |
| 3     | 1750              | 15         | 239.1      | 46.1      | 3248               | 3600    | 1.23             |
| 4     | 1750              | 20         | 260.6      | 49.8      | 2655               | 3300    | 1.23             |
| 5     | 1750              | 30         | 303.8      | 58.6      | 2628               | 3200    | 1.18             |
| 6     | 1750              | 60         | 338.5      | 65.3      | 1150               | 2700    | 1.26             |
| 7     | 1750              | 120        | 343.1      | 66.2      | 583                | 2500    | 1.25             |

<sup>a</sup> Polymerization conditions: 2  $\mu$ mol of Pd,  $[DMAS]_0/[Pd]_0 = 1750$ , 30 °C, 10 mL of  $CH_2Cl_2$ . <sup>b</sup> Molecular weight and PDI were determined by GPC using THF as eluent.

### S3. Characterization of polymer samples

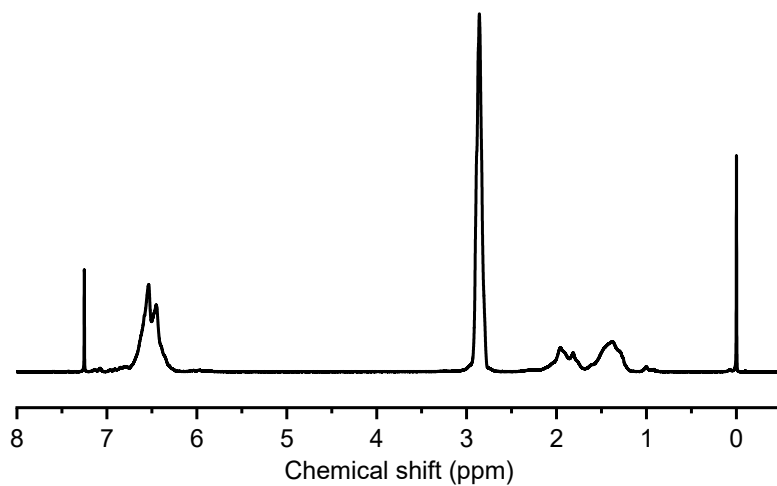

**Figure S7.** <sup>1</sup>H NMR spectrum of polymeric product of DMAS and ethylene copolymerization.

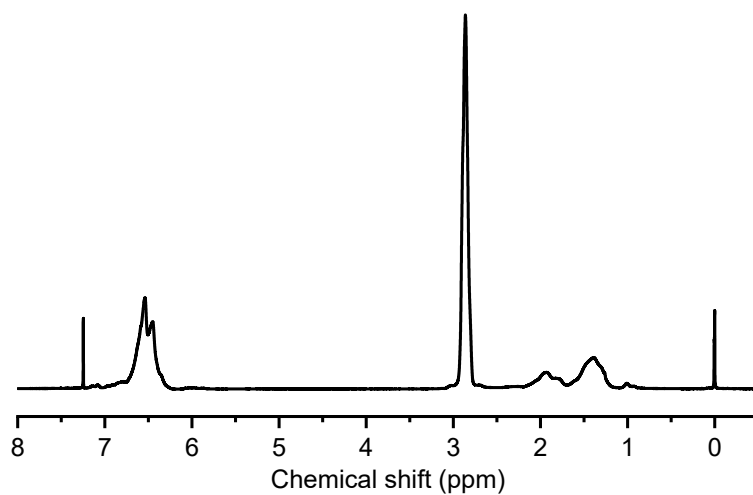

**Figure S8.** <sup>1</sup>H NMR spectrum of polymeric product of DMAS and CO copolymerization.

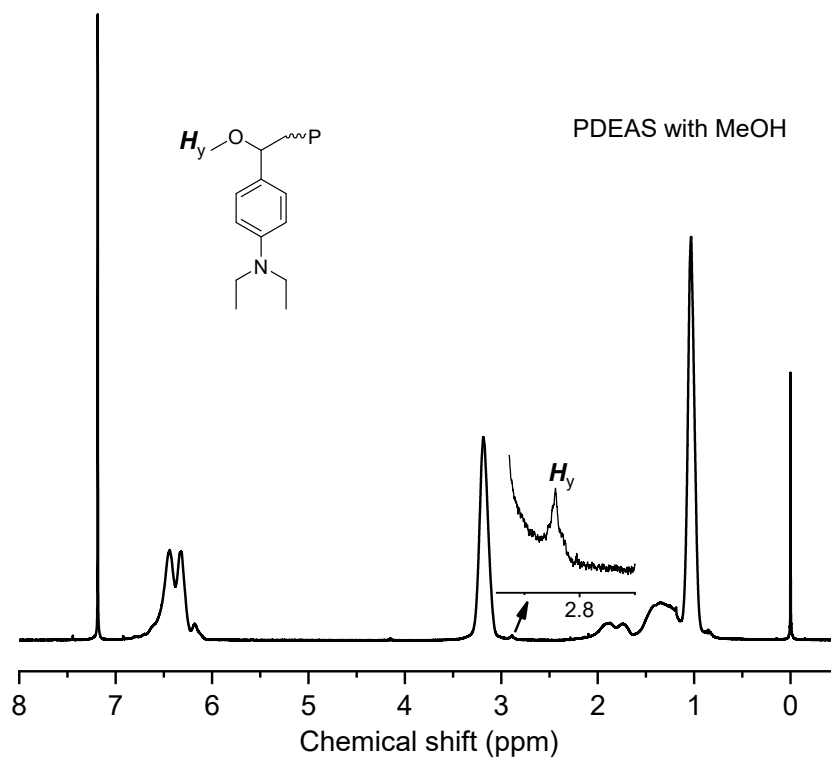

**Figure S9.**  $^1\text{H}$  NMR spectroscopy of PDEAS obtained with MeOH.

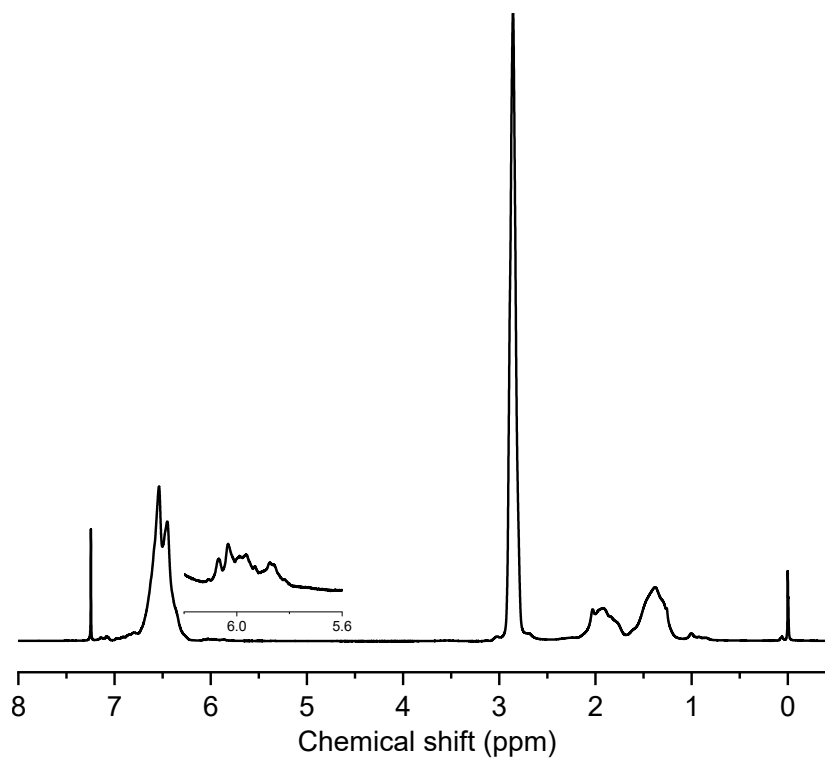

**Figure S10.**  $^1\text{H}$  NMR spectroscopy of PDMAS produced by **Pd1** (entry 2 in Table 1).

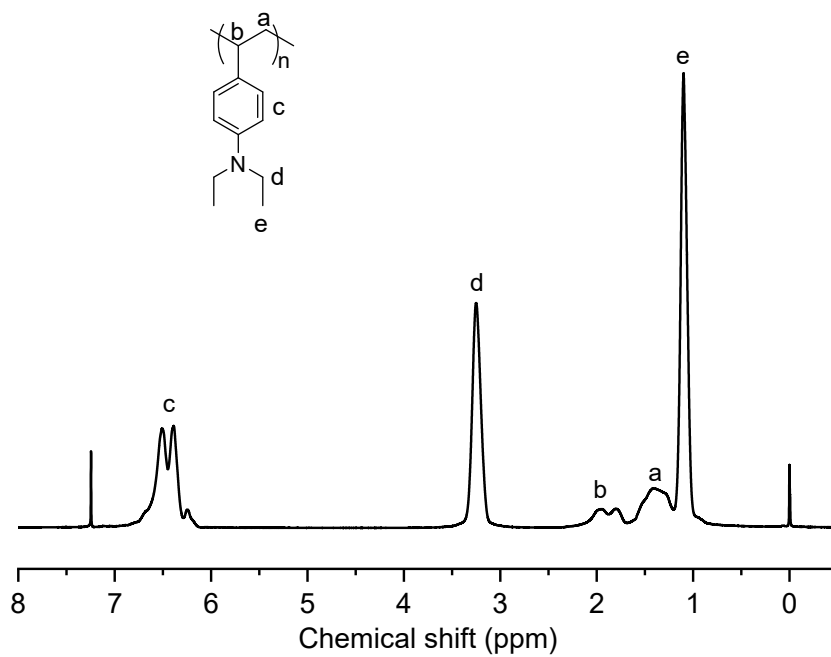

**Figure S11.**  $^1\text{H}$  NMR spectroscopy of PDEAS (entry 3 in Table 2).

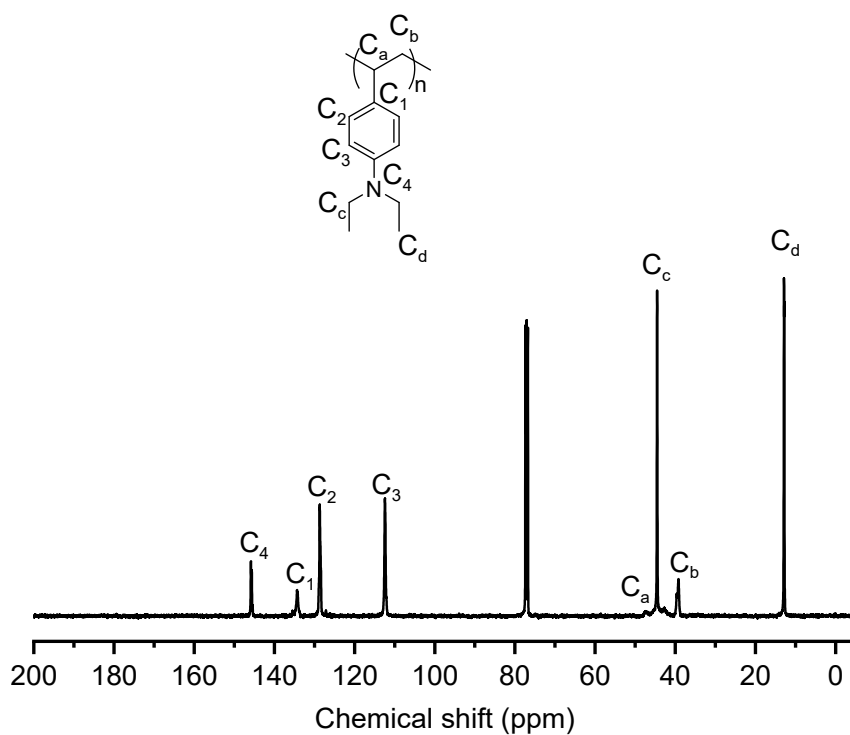

**Figure S12.**  $^{13}\text{C}$  NMR spectroscopy of PDEAS (entry 3 in Table 2).

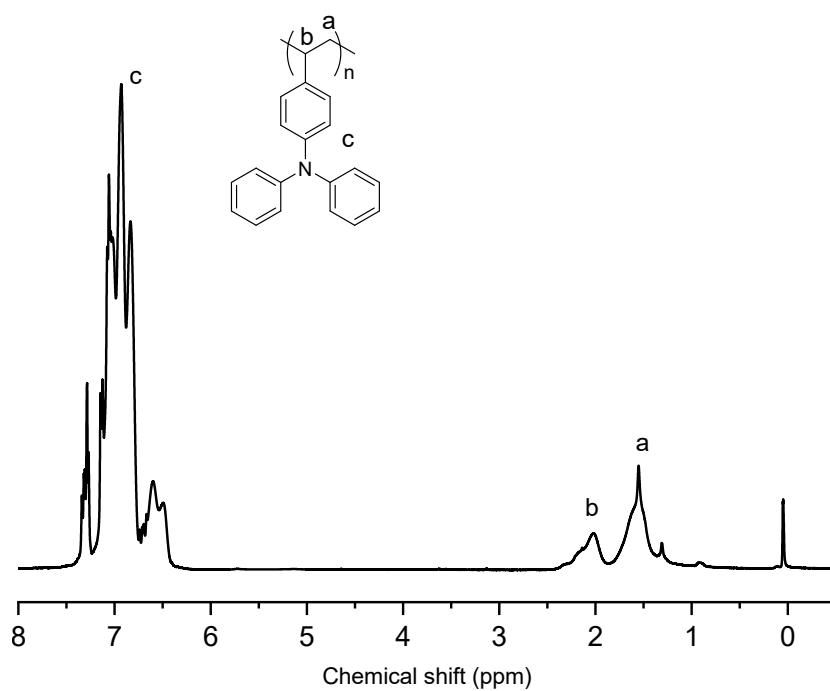

**Figure S13.** <sup>1</sup>H and spectroscopy of PDPAS (entry 7 in Table 2).

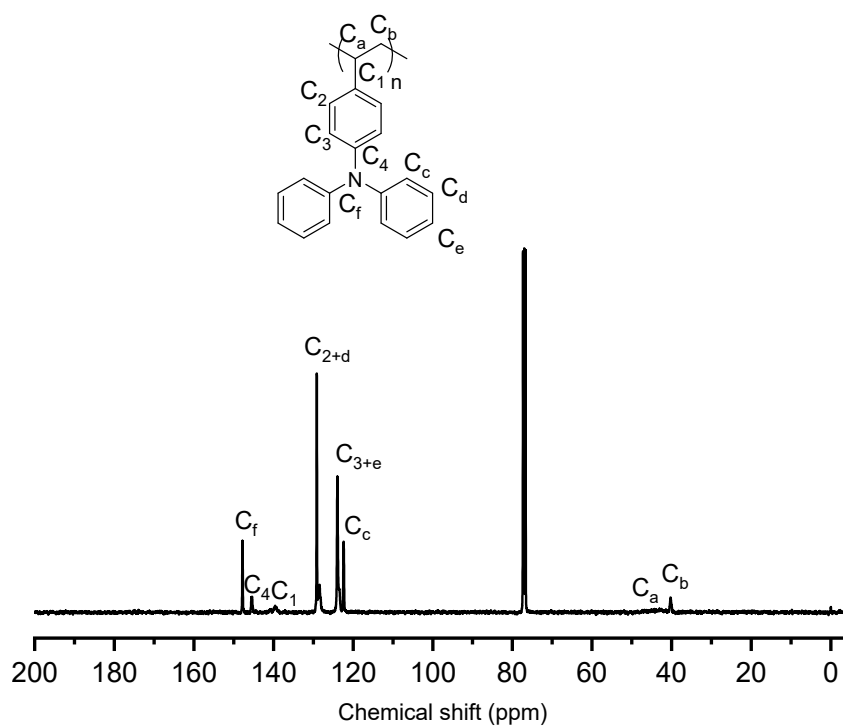

**Figure S14.** <sup>13</sup>C NMR spectroscopy of PDPAS (entry 7 in Table 2).

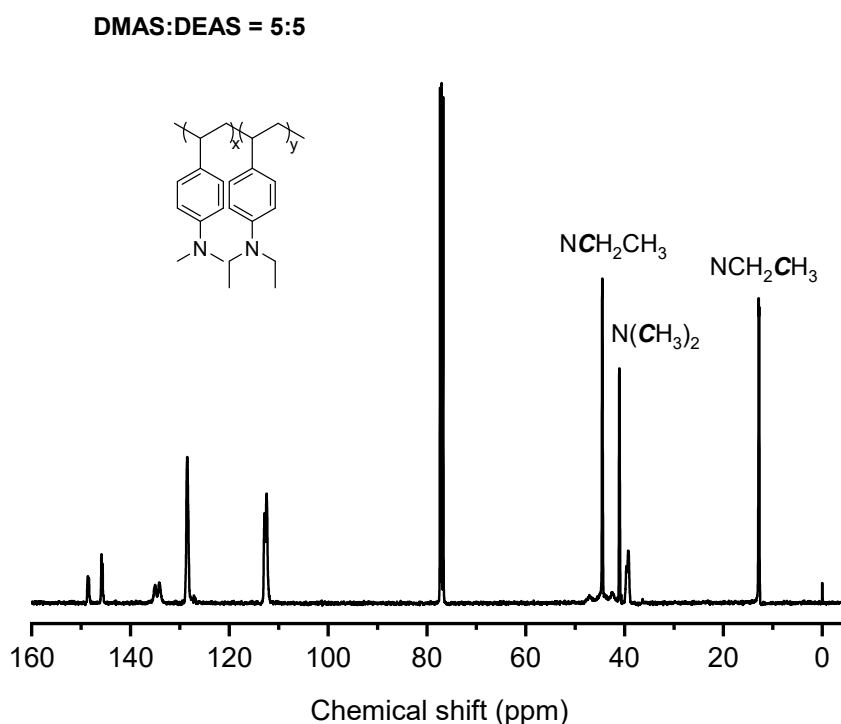

**Figure S15.**  $^{13}\text{C}$  NMR spectrum of poly(DMAS-*co*-DEAS) using **Pd2**.

#### S4. Computational details

By using the density functional theory<sup>5,6</sup> (DFT), all the calculations were performed with the Gaussian 16 program<sup>7</sup>. All the structures were carried out at the M06-L<sup>8</sup> functional and def2-SVP<sup>9</sup> basis sets. Based on optimized structures, frequency analysis calculations were performed to characterize the structures to be minima (no imaginary frequency) or transition states (one imaginary frequency). IRC calculations were taken to confirm the connection between two correct minima for a transition state. Based on M06-L/def2-SVP optimized geometries, the energy results were further refined by calculating the single-point energy at the M06-L/def2-



TZVP<sup>5, 6</sup> level of theory. At the M06-L/def2-TZVP level of theory, the bulky solvation effect of dichloromethane ( $\epsilon = 8.93$ ) were simulated by the SMD<sup>7</sup> continuum solvent model.

### The Cartesian coordinates (xyz) for all optimized structures

#### IM-Pd0

1 1

N 2.24589400 -0.51007600 0.65037100  
 C 1.76467200 -1.19352700 1.64653000  
 C 0.31312500 -1.50543700 1.61383000  
 N -0.33950800 -1.15161700 0.54967900  
 C -1.74168600 -1.29506400 0.48021900  
 C -2.54904500 -0.55468600 1.34920200  
 C -2.29386600 -2.13458500 -0.49045400  
 C -3.93971700 -0.64127000 1.22973900  
 C -3.68817600 -2.22619200 -0.59605600  
 C -4.51754500 -1.47095000 0.25341800  
 C 3.62352700 -0.18945000 0.57692300  
 C 4.57459100 -1.20550400 0.43836700  
 C 3.99069800 1.15707000 0.59045300  
 C 5.92663500 -0.85953400 0.30934200  
 C 5.34527700 1.49727100 0.48560700  
 C 6.32378100 0.49054800 0.36337900  
 C 2.36106100 0.68438200 -2.15633300  
 H 3.22166000 -0.00048200 -2.11584800  
 H 2.06390200 0.85544400 -3.20031100  
 H 2.62680400 1.64224100 -1.68379000  
 C -0.33393600 -0.17501300 -2.74956700  
 H -1.10619400 -0.94316200 -2.63098100  
 H 0.35473200 -0.32486300 -3.58397700  
 C -0.57527300 1.10743000 -2.24758900  
 H 0.12861500 1.90523900 -2.51234600  
 H 4.24981000 -2.24574700 0.40161900  
 H 3.21616000 1.91779300 0.6850010  
 H -1.63256200 -2.70858100 -1.13954600  
 H -2.08377500 0.11536100 2.07273900  
 C 2.56454200 -1.61998700 2.82894900  
 H 3.53137200 -1.10835500 2.87247100  
 H 2.01840700 -1.42790700 3.76169400  
 H 2.76495900 -2.70254500 2.80678500

C -0.29018500 -2.20914100 2.78260600  
 H -0.37942100 -1.54246500 3.65423000  
 H -1.29160200 -2.58976100 2.55658400  
 H 0.34201200 -3.04856200 3.10196900  
 O 6.92352900 -1.74722100 0.14496100  
 O 5.81080200 2.75765400 0.4872260  
 O 7.63029600 0.82199300 0.3198270  
 O -4.33031000 -2.97125800 -1.51517800  
 O -5.85733700 -1.42399500 0.05331900  
 O -4.80840400 0.06914000 1.97541600  
 C 8.19401200 0.93009500 -0.97457100  
 H 9.25060900 1.18575200 -0.84388500  
 H 8.12444000 -0.02002200 -1.52720000  
 H 7.70442500 1.72705700 -1.55700300  
 C 4.88400800 3.81063600 0.5789690  
 H 4.17056100 3.80153500 -0.26194000  
 H 4.31972400 3.77785800 1.5251770  
 H 5.45952100 4.74068200 0.5442360  
 C 6.60159400 -3.11550600 0.12035400  
 H 6.12986200 -3.43975600 1.06255900  
 H 5.93053500 -3.36347900 -0.71825800  
 H 7.54252700 -3.65947300 -0.00704000  
 C -3.56105900 -3.70088700 -2.44068400  
 H -2.91823200 -3.04029700 -3.04628100  
 H -2.92933800 -4.45519000 -1.94485300  
 H -4.26599000 -4.21042100 -3.10441500  
 C -6.59837400 -2.51778900 0.56793100  
 H -7.64890300 -2.34302400 0.31286400  
 H -6.27763000 -3.46975500 0.11881200  
 H -6.50344800 -2.57962000 1.66387600  
 C -4.28976500 0.97835600 2.91390300  
 H -5.14753900 1.48227000 3.37290100  
 H -3.71664600 0.46806700 3.70566700  
 H -3.64284800 1.73444900 2.43584000  
 C -1.78016600 1.53677300 -1.57448000  
 C -3.01409400 0.87608800 -1.75879000

C -1.78793300 2.69597800 -0.76999100  
C -4.17673600 1.32642400 -1.17101400  
H -3.06761400 0.01010000 -2.42426200  
C -2.93576100 3.14329000 -0.14556100  
H -0.85495100 3.24982400 -0.62771900  
C -4.17050500 2.46089000 -0.31843400  
H -5.10754000 0.79464000 -1.36923200  
H -2.88738300 4.04283000 0.46888200  
N -5.31010200 2.88359700 0.30188600  
Pd 0.90752400 -0.14246300 -1.00193800  
C -5.31203200 4.12457400 1.03985700  
H -6.30973700 4.30290000 1.45225700  
H -4.60287300 4.10420800 1.88367300  
H -5.04996700 4.98906100 0.40749500  
C -6.55958400 2.18333600 0.08565200  
H -6.93791800 2.30911900 -0.94316200  
H -6.45269900 1.10738100 0.28477900  
H -7.31703600 2.57742000 0.77073100

## IM-Pd1

I 1

N -1.33001100 1.92814400 -0.37566300  
C -2.31061700 2.75719700 -0.16339700  
C -3.67176100 2.18040700 -0.08980400  
N -3.76486300 0.88779700 -0.20853400  
C -4.98810800 0.20152100 -0.09039500  
C -5.35459000 -0.66820100 -1.12202500  
C -5.77228900 0.31861300 1.06477800  
C -6.53446300 -1.40913100 -1.01008200  
C -6.94083700 -0.44375000 1.18323700  
C -7.32329900 -1.32353100 0.15373300  
C 0.01606100 2.34452400 -0.37213200  
C 0.58720800 2.92026100 0.77245000  
C 0.80386100 2.09815200 -1.49970800  
C 1.93989700 3.27483600 0.77269700  
C 2.16015000 2.44469000 -1.49411200  
C 2.73509400 3.06975600 -0.37265400  
H -0.03170500 3.07275000 1.65714600  
H 0.34269100 1.63047700 -2.36829600  
H -5.44959300 0.98032700 1.86846800  
H -4.70201400 -0.75436000 -1.99030400  
C -2.15999800 4.23717800 -0.02539200

H -1.12973600 4.56620400 -0.19100800  
H -2.80518000 4.76057800 -0.74471500  
H -2.47336600 4.58668500 0.97031700  
C -4.83270600 3.10580200 0.07824500  
H -4.76039300 3.95777200 -0.61070700  
H -5.78567100 2.59742100 -0.10056800  
H -4.87143400 3.53520900 1.09163100  
O 2.58573700 3.79360300 1.83903500  
O 3.00350200 2.19026000 -2.52267600  
O 4.04881200 3.38821100 -0.28356600  
O -7.76521000 -0.40801500 2.24949800  
O -8.41448800 -2.10705500 0.31070800  
O -6.98807600 -2.25878500 -1.95315800  
C 4.65812200 4.10545600 -1.33976500  
H 5.44851400 4.72309700 -0.89311100  
H 5.10451300 3.43511900 -2.08871000  
H 3.94215800 4.76800300 -1.84804300  
C 2.50760400 1.45789900 -3.61503100  
H 2.11097000 0.47820700 -3.29808100  
H 1.71578600 2.00299300 -4.15370100  
H 3.34961300 1.29920300 -4.29756300  
C 1.83963900 4.05188100 2.99980400  
H 1.02336500 4.76971700 2.81428200  
H 1.40527300 3.13151800 3.42624700  
H 2.52965500 4.48642600 3.73023900  
C -7.42100000 0.42547500 3.32403000  
H -6.45305100 0.14284500 3.77026900  
H -7.37494100 1.48688300 3.02549300  
H -8.20409200 0.30765000 4.07980500  
C -9.59015200 -1.64232000 -0.32128500  
H -10.37630200 -2.37855600 -0.12166500  
H -9.90605400 -0.66837500 0.08804400  
H -9.45884800 -1.55124800 -1.41129800  
C -6.19938800 -2.45437400 -3.10004700  
H -6.72194000 -3.18925500 -3.72051400  
H -6.07683700 -1.52371300 -3.67838200  
H -5.20137700 -2.84684000 -2.84574100  
Pd -1.89183700 -0.22176600 -0.44643800  
C 2.22078000 -0.46349100 0.47063900  
C 2.94781700 -0.87648300 -0.65766200  
C 4.26227900 -0.49283100 -0.86703800  
C 4.92433000 0.35836200 0.05346400  
C 4.22285300 0.72033700 1.22818400  
C 2.90965700 0.32373000 1.41127000

H 2.45625600 -1.50887200 -1.40370100  
H 4.76702000 -0.81635800 -1.77914300  
H 4.68232200 1.38336100 1.96118900  
H 2.37831600 0.66229300 2.30850100  
C 0.77494100 -0.80891500 0.66405800  
N 6.18746200 0.83226700 -0.19719700  
C 0.55679200 -2.04304800 1.65587400  
C 1.15533400 -3.24903800 1.09576000  
H 0.53224200 -3.88780900 0.45890700  
C 2.51910900 -3.49765600 1.09803300  
C 3.09083100 -4.40713600 0.15004000  
C 3.43659500 -2.73454200 1.89165500  
C 4.43521000 -4.43666900 -0.09439900  
H 2.42134600 -5.04275000 -0.43523400  
C 4.78575200 -2.77135500 1.67080900  
H 3.05360100 -2.11311900 2.70112300  
C 5.32712000 -3.57722600 0.62635100  
H 4.82232500 -5.10518100 -0.86242800  
H 5.44209400 -2.16681800 2.29522700  
N 6.64546700 -3.54439900 0.33742200  
C 6.80972200 1.74121200 0.73569700  
H 7.00149700 1.26562400 1.71384500  
H 7.77278700 2.07538500 0.33638200  
H 6.18361700 2.63004000 0.91466400  
C 6.84104800 0.50802100 -1.43860800  
H 7.03101200 -0.57580100 -1.54480000  
H 6.24696300 0.82003700 -2.31517200  
H 7.80792200 1.01877200 -1.49165400  
C 7.52187100 -2.62396600 1.03739600  
H 8.51523800 -2.64984400 0.58107200  
H 7.14227700 -1.59270400 0.97735800  
H 7.63047600 -2.88957200 2.09999500  
C 7.19950300 -4.39441800 -0.69890700  
H 7.02162700 -5.45892700 -0.48999000  
H 6.77220000 -4.16179900 -1.68672500  
H 8.28059900 -4.24255900 -0.75380400  
C -0.01840700 -1.01108500 -0.62717400  
H 0.42892800 -0.41320300 -1.43826600  
H 0.01069400 -2.06164000 -0.96037400  
H 0.34092600 0.02563900 1.24696200  
H 1.00115700 -1.76732000 2.62381100  
H -0.53082200 -2.14234600 1.78072300  
C -2.58408800 -2.13730200 -0.36528700  
H -1.87190000 -2.89829600 -0.00900900

H -3.47468700 -2.15284900 0.28425200  
H -2.88502500 -2.42434900 -1.38782100

## IM-Pd2

I 1

N -2.28961800 -1.05291400 0.16492200  
C -1.83052300 -2.27139900 0.11001300  
C -0.36430200 -2.41256200 0.25013100  
N 0.31550800 -1.34274500 0.53899700  
C 1.72911200 -1.33688300 0.60462000  
C 2.47057100 -1.39388300 -0.57831600  
C 2.34724200 -1.20160000 1.84871000  
C 3.86693200 -1.31416500 -0.50946400  
C 3.74612800 -1.14247300 1.91036100  
C 4.51170100 -1.18658000 0.73184500  
C -3.62448100 -0.68294700 0.00390100  
C -4.09601400 0.36297300 0.81667600  
C -4.47823300 -1.25657800 -0.95090200  
C -5.41356200 0.79564900 0.71180000  
C -5.79127700 -0.79877600 -1.09203900  
C -6.28041600 0.24241100 -0.26824700  
C -1.14545800 3.65045200 1.89594400  
H -0.41793300 4.44077400 2.12430500  
H -2.10543200 4.13904900 1.68600700  
H -1.26358700 3.03969400 2.80208300  
C 0.58527700 2.03846400 0.95935200  
H 0.86883400 1.95278900 2.02072500  
C -0.66034500 2.81913400 0.72267800  
H -0.60324800 3.41307300 -0.20264500  
H -1.56729800 2.12090000 0.45357100  
C -2.66050000 -3.50411200 -0.02470000  
H -2.70489700 -3.87042000 -1.06289300  
H -2.24784700 -4.32656500 0.57269700  
H -3.69256100 -3.32640000 0.30066200  
C 0.24702800 -3.76193300 0.08194500  
H -0.07296300 -4.42891000 0.89671100  
H -0.08483400 -4.23833100 -0.85123900  
H 1.34025300 -3.72601600 0.08757400  
H 1.73067500 -1.13934900 2.74571100  
H 1.95145700 -1.46864100 -1.53459800  
H -3.41621500 0.79383000 1.55434200  
H -4.10207600 -2.02949600 -1.61776700  
O 4.44837400 -0.99388900 3.04991800

O 5.85218300 -0.97567600 0.77685700  
O 4.67888700 -1.31150700 -1.58598700  
O -5.96524300 1.74860000 1.48031800  
O -7.51561700 0.74772500 -0.28704000  
O -6.66666600 -1.31942400 -1.97979400  
C 3.73885600 -0.87042400 4.25782300  
H 3.07079900 0.00715900 4.24983700  
H 3.13960900 -1.76925400 4.47611900  
H 4.48299700 -0.74043100 5.04959300  
C 6.64301800 -2.13314400 0.97610400  
H 6.51564300 -2.85244400 0.15075500  
H 7.68892700 -1.80914700 1.00487400  
H 6.40001200 -2.62775900 1.92955900  
C 4.09209200 -1.35841000 -2.86214100  
H 3.40052600 -0.51346300 -3.02412700  
H 4.91039600 -1.29264800 -3.58759100  
H 3.54654100 -2.30197700 -3.02838800  
C -5.16930200 2.34727900 2.47006300  
H -4.79781100 1.60978700 3.20049000  
H -4.30778700 2.87954300 2.03319300  
H -5.80387800 3.07168500 2.98978400  
C -8.31709600 0.78674100 -1.45685200  
H -9.04679800 1.58662800 -1.29003300  
H -7.72168200 1.02153500 -2.34894200  
H -8.85042100 -0.15819000 -1.61746300  
C -6.24443100 -2.37587500 -2.80491000  
H -7.10562100 -2.65931800 -3.41775500  
H -5.42056100 -2.07263200 -3.47133500  
H -5.92472500 -3.25180200 -2.21594100  
Pd -0.75154800 0.49715100 0.57757400  
C 1.72741800 2.04936400 0.06624400  
C 3.02537200 1.85168100 0.58032300  
C 1.61710600 2.21811700 -1.33162100  
C 4.14222300 1.80760800 -0.23015200  
H 3.15449800 1.73637600 1.66100300  
C 2.72207600 2.17429900 -2.16052900  
H 0.63170400 2.37503200 -1.78278400  
C 4.02344400 1.95086500 -1.63483000  
H 5.11794300 1.64252100 0.22716900  
H 2.57924500 2.30703900 -3.23366400  
N 5.11585400 1.86430200 -2.45196100  
C 4.99636100 2.16981900 -3.85641100  
H 5.98595100 2.14126200 -4.32302600  
H 4.35653200 1.44761900 -4.39278500

H 4.57614600 3.17420000 -4.02843600  
C 6.41457400 1.56299900 -1.88973000  
H 6.81061000 2.39183700 -1.27803600  
H 6.37222200 0.66196200 -1.25969600  
H 7.12673500 1.37617900 -2.70003200

## IM-Pd3

I 1

N -1.90844600 1.13762100 -0.26184500  
C -1.44913100 2.35045500 -0.39440000  
C 0.01995900 2.51150200 -0.28062000  
N 0.69552300 1.42721000 -0.07103800  
C 2.09411300 1.36111500 0.05518800  
C 2.60864600 0.88277400 1.26438100  
C 2.93689000 1.65402000 -1.02364800  
C 3.98731500 0.70248400 1.40296500  
C 4.31485300 1.43614700 -0.88995300  
C 4.84648600 0.94011900 0.31474500  
C -3.27100000 0.81375900 -0.29222600  
C -3.66185400 -0.28925900 -1.06323400  
C -4.21887600 1.50897200 0.47040300  
C -4.99593400 -0.68571000 -1.08541000  
C -5.55626200 1.09865400 0.47240400  
C -5.96494200 -0.01313700 -0.29750600  
C -1.05980800 -2.43531200 0.15237400  
H -1.60313300 -2.68666300 -0.77202500  
C -1.76117800 -2.87304200 1.40691900  
H -1.21782900 -2.51093300 2.29517300  
C -2.27810900 3.55052300 -0.70942400  
H -2.48204200 4.16208400 0.18388200  
H -1.76051500 4.20847700 -1.41958100  
H -3.24756900 3.26834800 -1.13630900  
C 0.62198100 3.87184300 -0.38154000  
H 0.62077000 4.23376500 -1.42148200  
H 0.04754700 4.60537400 0.19997600  
H 1.66026800 3.87907600 -0.03148200  
H 2.50759200 2.00970900 -1.96058400  
H 1.91758000 0.64797500 2.07422100  
H -2.89893300 -0.82758700 -1.62616000  
H -3.90352800 2.34393200 1.09381100  
O 5.21564900 1.65081200 -1.87153800  
O 6.16269500 0.61860200 0.40487000  
O 4.58046300 0.26178000 2.53330400

O -5.46320800 -1.72818100 -1.79392600  
O -7.21550600 -0.48069400 -0.38827800  
O -6.52568500 1.73194600 1.16948400  
C 4.75011200 2.13395900 -3.10778300  
H 4.04641900 1.42987600 -3.58325800  
H 4.25509700 3.11323900 -3.00552100  
H 5.62631600 2.24728500 -3.75351700  
C 7.03036700 1.68587600 0.75060400  
H 6.78117500 2.09756000 1.74120300  
H 8.04599200 1.27757100 0.78342700  
H 6.99490700 2.49177600 0.00136700  
C 3.77343600 0.06035200 3.66949300  
H 3.01608800 -0.72416800 3.50281200  
H 4.44018000 -0.25531300 4.47793200  
H 3.25939400 0.98674600 3.97124400  
C -4.56644100 -2.42296600 -2.62191600  
H -4.11277500 -1.76224700 -3.37868800  
H -3.75990600 -2.90357000 -2.04217300  
H -5.14438200 -3.20093000 -3.13007600  
C -8.11032200 -0.44879500 0.71109300  
H -8.84435200 -1.24053600 0.52441600  
H -7.59306500 -0.65479100 1.65855500  
H -8.62971100 0.51439400 0.78961200  
C -6.17638500 2.85260600 1.94157500  
H -7.09953000 3.21807200 2.40189500  
H -5.46025300 2.59547300 2.73913600  
H -5.74693100 3.65762500 1.32219800  
Pd -0.40236800 -0.45535200 0.01310900  
C 0.38166000 -2.44666100 0.03240300  
C 0.97717000 -2.19249200 -1.24898000  
C 1.29359000 -2.58594700 1.12822900  
C 2.34142100 -2.07383400 -1.42182600  
H 0.32777800 -2.16223800 -2.12844100  
C 2.65252800 -2.49103500 0.95728200  
H 0.89916900 -2.79425200 2.12584500  
C 3.22963000 -2.21360500 -0.32214400  
H 2.73027400 -1.90481100 -2.42500400  
H 3.30400000 -2.60807600 1.82381000  
N 4.57170900 -2.09883000 -0.46163400  
C 5.46366300 -2.44825400 0.62971500  
H 6.49422900 -2.43330900 0.26461400  
H 5.40151700 -1.72895400 1.45958600  
H 5.25183200 -3.45863700 1.00920400  
C 5.17759100 -1.70468300 -1.71499300

H 5.38598200 -2.56597500 -2.37195900  
H 4.53228900 -1.00460600 -2.25804200  
H 6.11537400 -1.17540000 -1.50923400  
H -1.70032300 -3.97689600 1.46664500  
C -3.21333100 -2.44848500 1.49690900  
H -3.69409700 -2.86608600 2.39111700  
H -3.31424100 -1.35420700 1.54626100  
H -3.79352100 -2.78978700 0.62639000

## IM-Pd4

I 1  
N 1.33452700 -1.08620900 -1.43156900  
C 0.96116700 -2.28686300 -1.74330100  
C -0.45876800 -2.63957900 -1.50455100  
N -1.17367300 -1.81113400 -0.81214800  
C -2.52790500 -2.13789100 -0.53306700  
C -2.82582600 -2.79233800 0.66188500  
C -3.53774000 -1.70416100 -1.39049200  
C -4.16430000 -3.02608300 1.00185800  
C -4.87866400 -1.91792200 -1.03669100  
C -5.20814000 -2.58777000 0.15858300  
C 2.70191500 -0.75844700 -1.51099200  
C 3.12935000 0.23714600 -2.38959000  
C 3.61994600 -1.42537400 -0.69123100  
C 4.49275900 0.54847400 -2.47739300  
C 4.96605200 -1.06713400 -0.72762500  
C 5.42729700 -0.07830400 -1.62681600  
C -3.00916100 -0.09447000 3.24302000  
H -3.65569300 -0.85282700 2.77665200  
H -2.75637100 -0.44470300 4.25363000  
H -3.61386100 0.81728500 3.34727900  
C -2.08351700 0.57918000 0.99884700  
H -2.61675400 -0.21064100 0.46001100  
C -1.75668700 0.15580700 2.41100600  
H -1.14848800 -0.76619400 2.38209900  
H -1.12348900 0.90646600 2.91562500  
C 0.09247300 2.20483100 0.48112200  
H -0.54237200 2.79753800 -0.18088700  
H -0.13286200 2.28310700 1.54814300  
C 1.35293200 1.82074900 0.06465000  
H 1.63662300 2.05414200 -0.97075300  
H 2.39740900 0.72536900 -3.03250600  
H 3.25529000 -2.17233000 0.01431900

H -3.27179900 -1.16605800 -2.30097400  
H -2.01231600 -3.10381700 1.31741800  
O -5.92371500 -1.49244500 -1.77874800  
O -6.46903000 -2.78945700 0.58533500  
O -4.55423500 -3.64318200 2.13109300  
O 4.98966500 1.45643300 -3.34955200  
O 6.74792000 0.18032900 -1.58293200  
O 5.90584400 -1.58512100 0.08862300  
C -5.66582300 -0.82958800 -2.98972400  
H -5.11515400 0.11304100 -2.83371300  
H -5.09695300 -1.46065200 -3.69197300  
H -6.63848000 -0.59689500 -3.43472300  
C -7.43076900 -3.32981500 -0.30252300  
H -6.96903700 -4.00503700 -1.03857600  
H -8.13550000 -3.90615600 0.30888200  
H -7.98169900 -2.54495400 -0.83815700  
C -3.56600900 -4.09804000 3.01953300  
H -4.08949000 -4.56579400 3.85929500  
H -2.90587100 -4.84729400 2.55193600  
H -2.94619400 -3.27097200 3.40488700  
C 4.08953300 2.18825300 -4.14188100  
H 3.51531900 1.53725300 -4.82061700  
H 3.38252500 2.77130300 -3.52724600  
H 4.68848800 2.87984200 -4.74294700  
C 7.25485600 1.48138700 -1.80933200  
H 8.21975900 1.52688000 -1.28936700  
H 7.41443400 1.68394900 -2.87623400  
H 6.59303800 2.25827000 -1.39786800  
C 5.51442600 -2.58333200 0.99526800  
H 4.71601800 -2.23503800 1.67364600  
H 5.16536600 -3.49157800 0.47599300  
H 6.39994000 -2.83518000 1.58952000  
C 1.84784800 -3.33039600 -2.34290800  
H 1.34758700 -3.83680400 -3.17847200  
H 2.79088800 -2.90800600 -2.70405600  
H 2.09725000 -4.11721900 -1.61410300  
C -0.96876300 -3.93172200 -2.04978100  
H -0.90322600 -3.94182000 -3.14800500  
H -0.35574200 -4.77463800 -1.70048100  
H -2.00872000 -4.11985200 -1.76773400  
C -2.76881900 1.84598600 0.77916400  
C -3.48324300 2.04934200 -0.42091300  
C -2.75638900 2.92176000 1.69014600  
C -4.13594900 3.23214700 -0.70648500

H -3.51521200 1.23120500 -1.14812700  
C -3.41072000 4.11265100 1.43029500  
H -2.22239400 2.82201000 2.63990900  
C -4.12202100 4.30817300 0.21889700  
H -4.67767500 3.32437200 -1.64838900  
H -3.37564400 4.90431600 2.17860600  
C 2.44861400 1.37825100 0.91288600  
C 2.26996600 0.60918100 2.07722100  
C 3.76411100 1.74917200 0.58399300  
C 3.34482600 0.18414300 2.83925200  
H 1.25746200 0.30128000 2.36197500  
C 4.84707300 1.36655200 1.35398200  
H 3.93543800 2.36783300 -0.30287000  
C 4.67404100 0.53286700 2.48366800  
H 3.15575700 -0.43977300 3.71352600  
H 5.84557000 1.69356800 1.06346500  
N -4.77323600 5.48255600 -0.04302200  
N 5.75162600 0.06343600 3.18795300  
Pd -0.29756300 0.16044400 -0.19818400  
C 7.09078100 0.34973600 2.72785700  
H 7.81096100 -0.22578100 3.31857500  
H 7.21631700 0.06488600 1.67082100  
H 7.35469300 1.41681000 2.82819100  
C 5.55101500 -0.69250500 4.39848300  
H 4.95199300 -0.13830300 5.13929400  
H 5.04182300 -1.65564800 4.21588700  
H 6.51939600 -0.91378900 4.85818500  
C -5.48379300 5.65262500 -1.28682600  
H -6.29785300 4.91831500 -1.40486100  
H -5.93116300 6.65059300 -1.31998600  
H -4.81820700 5.55759500 -2.16060800  
C -4.76510700 6.54764900 0.93074200  
H -5.20998700 6.23524300 1.88976500  
H -3.74620800 6.91406100 1.13835500  
H -5.35053500 7.39180900 0.55435000

## IM-Pd5

0 1

N 0.19285900 -1.39142600 0.43064900  
C -0.42360400 -1.80326000 1.50509100  
C -1.84871200 -1.45093200 1.60285200  
N -2.29831300 -0.61456300 0.70525200  
C -3.64242400 -0.27762100 0.53735800

C -4.68427100 -1.21788100 0.62440700  
C -3.92476400 1.04820200 0.17479900  
C -5.99879800 -0.82271300 0.35904400  
C -5.24171200 1.44470200 -0.05844600  
C -6.29561500 0.51829700 0.05354900  
C 1.56458000 -1.55101300 0.20472100  
C 1.97463100 -2.02545700 -1.04581700  
C 2.52288300 -1.14898800 1.14584400  
C 3.33355400 -2.13689100 -1.34436300  
C 3.87918700 -1.20120300 0.82267200  
C 4.30765100 -1.70356200 -0.42356700  
C -0.74109500 2.16299000 -1.54549300  
H -1.44196100 2.22258600 -2.38684000  
H -0.83061900 3.00158500 -0.84162500  
C 0.51514200 1.52583500 -1.75594700  
H 0.68571700 1.06558700 -2.74045000  
H 1.20885800 -2.30268100 -1.76944300  
H 2.19168700 -0.71227100 2.08741500  
H -3.08060700 1.73117700 0.07036200  
H -4.45035600 -2.26187700 0.82610600  
O -5.60378600 2.70001900 -0.40607900  
O -7.58456700 0.89889100 -0.13341200  
O -7.06135400 -1.66073700 0.37356200  
O 3.79701800 -2.63705400 -2.52058600  
O 5.64482700 -1.71916900 -0.64162800  
O 4.86449500 -0.76633100 1.64061800  
C -4.58185000 3.65350000 -0.55753400  
H -4.02432800 3.81009600 0.38062800  
H -3.86399300 3.36752600 -1.34383300  
H -5.06707000 4.59313000 -0.84149300  
C -7.98480300 1.00409800 -1.48252700  
H -7.91702100 0.03173500 -1.99917200  
H -9.03121400 1.33050000 -1.48634000  
H -7.38146300 1.74500800 -2.03146700  
C -6.83188900 -3.00286700 0.70272800  
H -7.80496600 -3.50526100 0.68545000  
H -6.16459600 -3.50095700 -0.02124500  
H -6.39574800 -3.11279200 1.71068300  
C 2.86068000 -2.93184900 -3.52210800  
H 2.17361900 -3.74031800 -3.22146500  
H 2.25913300 -2.04854400 -3.79729100  
H 3.42809400 -3.26230900 -4.39895200  
C 6.16187000 -1.41424100 -1.91889100  
H 6.26095000 -2.30900100 -2.54936800

H 5.53816500 -0.68269000 -2.45521700  
H 7.15763500 -0.97850400 -1.75862000  
C 4.49335300 -0.19682100 2.86589800  
H 3.83301200 0.67788200 2.72952400  
H 3.98437800 -0.92588900 3.52048100  
H 5.41827700 0.12961700 3.35599200  
C 0.19954600 -2.64175400 2.57695500  
H -0.45773700 -3.47778100 2.85481200  
H 1.16193100 -3.05540200 2.25428500  
H 0.38216400 -2.07218100 3.50287400  
C -2.64587200 -1.99410100 2.74829900  
H -2.06274900 -1.95095200 3.67875000  
H -3.57264100 -1.42918300 2.90095600  
H -2.92331600 -3.05187700 2.61024900  
C 1.75704500 1.80300000 -1.01653400  
C 1.78560000 2.47978700 0.21651400  
C 2.99594800 1.36358100 -1.50957800  
C 2.96595000 2.69816200 0.91493800  
H 0.84663900 2.83574300 0.65115200  
C 4.18739100 1.56979200 -0.82416700  
H 3.02490600 0.83307500 -2.46841100  
C 4.20477200 2.23239200 0.41862900  
H 2.92217500 3.22991500 1.86758200  
H 5.11820300 1.20309600 -1.25821100  
N 5.37994600 2.40511800 1.13023300  
Pd -0.75685700 0.28133200 -0.65479400  
C 6.60632200 1.84749400 0.62442900  
H 7.39998400 1.97201300 1.37060500  
H 6.49983200 0.76716800 0.43215100  
H 6.95146700 2.32821100 -0.31164500  
C 5.39973800 3.28034000 2.26786600  
H 5.04736800 4.30035900 2.02835800  
H 4.77103500 2.91315200 3.10087400  
H 6.42345300 3.36510500 2.64987500

## TS1

I 1  
N -0.84037500 -1.55343600 -1.36270400  
C -0.45633600 -2.75931300 -1.67211100  
C 0.95346200 -3.10000200 -1.38117600  
N 1.66699700 -2.18473300 -0.79509700  
C 3.01373900 -2.39845700 -0.42747400  
C 3.99018700 -1.56905600 -0.98287800

C 3.34041700 -3.35649700 0.53842600  
C 5.32227600 -1.71585000 -0.58102100  
C 4.67241100 -3.48200300 0.95555300  
C 5.66917100 -2.65090600 0.41230800  
C -2.16842100 -1.13151200 -1.52513600  
C -3.23501600 -1.84534000 -0.96283300  
C -2.41086300 0.04649100 -2.23692200  
C -4.53510500 -1.36683400 -1.10306500  
C -3.72089500 0.49759100 -2.42708700  
C -4.80279200 -0.18844500 -1.83793100  
H -3.02923600 -2.73324800 -0.36613200  
H -1.56372100 0.57488100 -2.67258100  
H 2.55164200 -3.97309900 0.96991200  
H 3.68990500 -0.81714400 -1.71222100  
C -1.31375900 -3.78711700 -2.33533000  
H -2.22762100 -3.35081200 -2.75157200  
H -0.76867800 -4.29006700 -3.14424700  
H -1.61697000 -4.58080900 -1.63448700  
C 1.47334600 -4.43175100 -1.81022000  
H 1.31494300 -4.57988900 -2.88795100  
H 2.54172700 -4.54323600 -1.60343000  
H 0.94055200 -5.25341600 -1.30843900  
O -5.61459900 -1.94599100 -0.53801800  
O -4.02421600 1.59714200 -3.15951900  
O -6.09991200 0.17549000 -1.89433600  
O 5.09754500 -4.36597600 1.87963600  
O 6.94158700 -2.72202700 0.86733300  
O 6.34520900 -0.98748500 -1.07099200  
C -6.49103400 1.52915600 -2.01744300  
H -7.52001100 1.58202300 -1.64039300  
H -5.85508400 2.19844100 -1.41784100  
H -6.47376800 1.87242800 -3.05974400  
C -2.96918800 2.34654700 -3.70471100  
H -2.29127400 2.73090000 -2.92336900  
H -2.37757100 1.75970900 -4.42586000  
H -3.42269800 3.19389600 -4.22895300  
C -5.41926600 -3.11310900 0.21653900  
H -5.01370400 -3.93439000 -0.39796100  
H -4.74108700 -2.94112700 1.07096100  
H -6.40271100 -3.41181500 0.59641600  
C 4.14706800 -5.20140100 2.48784400  
H 3.38138600 -4.62391500 3.03150600  
H 3.64355300 -5.85470600 1.75543400  
H 4.68873600 -5.82815100 3.20323300  
C 7.77474600 -3.63995200 0.18820300  
H 8.76137300 -3.59246700 0.66172900  
H 7.39312600 -4.67068000 0.27015800  
H 7.88093800 -3.37810400 -0.87720900  
C 6.05336100 0.00189000 -2.02332700  
H 7.00307100 0.48072900 -2.28255800  
H 5.60993200 -0.42452200 -2.93848400  
H 5.36622500 0.76576500 -1.62248700  
Pd 0.65921900 -0.33956500 -0.27826200  
C 2.20753000 0.49695800 0.75446600  
H 2.79955700 -0.31465900 1.20565200  
H 2.83421100 1.04221300 0.02701500  
H 1.90146600 1.20500800 1.54037900  
C -2.24713800 0.63730900 1.72449300  
C -3.34564600 1.13007600 0.99686800  
C -4.63517200 0.69408700 1.23638800  
C -4.90332600 -0.29770700 2.21205500  
C -3.79987600 -0.79760900 2.94812900  
C -2.51881600 -0.32397000 2.71386800  
H -3.18654700 1.89942600 0.23301800  
H -5.45463900 1.11487900 0.65490500  
H -3.95030600 -1.55450300 3.71864100  
H -1.69133800 -0.71764900 3.31208900  
C -0.89187600 1.17697200 1.54858100  
N -6.17739400 -0.74828600 2.43394100  
C -1.06675000 2.91504000 2.44832500  
C 0.22501500 3.35556200 2.74574800  
H 0.67085500 2.98921600 3.67910700  
C 1.09342200 4.09586100 1.91032100  
C 2.45485200 4.26943700 2.27663600  
C 0.68260300 4.68560900 0.68389200  
C 3.34227600 4.96458800 1.48981800  
H 2.80595100 3.82703400 3.21273100  
C 1.55780500 5.38506900 -0.11372300  
H -0.35950900 4.59639300 0.36853300  
C 2.92103200 5.54970700 0.26326100  
H 4.37616700 5.06363300 1.81840300  
H 1.19044200 5.82864000 -1.03866800  
N 3.78696600 6.25047600 -0.51621300  
C -6.43883100 -1.65377000 3.52537100  
H -6.14613500 -1.23149500 4.50155500  
H -7.50923900 -1.87780700 3.56730600  
H -5.90478500 -2.61213200 3.40875300  
C -7.27961200 -0.21303000 1.66583100



H -7.45839400 0.85653800 1.87466500  
H -7.10559900 -0.33267900 0.58536100  
H -8.19525300 -0.75717400 1.91885200  
C 3.33580400 6.84809000 -1.75388000  
H 4.17312600 7.35657000 -2.23967500  
H 2.94884500 6.09333100 -2.45602800  
H 2.54207700 7.59313800 -1.58647300  
C 5.16053800 6.43217600 -0.09813900  
H 5.23019700 6.96485600 0.86305000  
H 5.68697200 5.47111600 0.00912800  
H 5.69424900 7.02356900 -0.84712400  
C -0.35700300 1.42406600 0.21089800  
H -1.13931600 1.63148000 -0.53736900  
H 0.42823100 2.19103600 0.16557200  
H -0.17642800 0.74844700 2.25989300  
H -1.63769100 3.43389600 1.67195200  
H -1.67850800 2.60121400 3.29659300

## TS2(2,1)

1 1

N -2.359667 0.667480 0.640619  
C -1.927509 1.743315 1.226982  
C -0.459483 1.936271 1.225702  
N 0.232769 1.188625 0.421946  
C 1.652250 1.234076 0.452241  
C 2.332668 0.350208 1.277124  
C 2.341991 2.135987 -0.364445  
C 3.734587 0.367897 1.323291  
C 3.739619 2.133140 -0.342702  
C 4.452281 1.264072 0.513039  
C -3.725671 0.379331 0.507406  
C -4.596168 1.274409 -0.132018  
C -4.185900 -0.872338 0.928151  
C -5.930161 0.916973 -0.336374  
C -5.525557 -1.228083 0.741755  
C -6.421536 -0.334402 0.113234  
C -2.289857 -1.683923 -1.556225  
H -3.032334 -0.886230 -1.697696  
H -2.492505 -2.457365 -2.299159  
H -2.371533 -2.150545 -0.563712  
C 0.627670 -0.795518 -2.188394  
H 0.757817 0.123356 -2.778043  
C -0.515088 -1.603023 -2.523847

H -1.019669 -1.333862 -3.455030  
H -0.374558 -2.682993 -2.424141  
Pd -0.827530 -0.279332 -0.751309  
C -2.783425 2.731342 1.944464  
H -2.345416 2.999657 2.914770  
H -2.874815 3.672652 1.379451  
H -3.795732 2.348140 2.111738  
C 0.132755 2.939155 2.155506  
H -0.313301 3.931043 1.994701  
H -0.079612 2.673606 3.202168  
H 1.217122 3.022510 2.038892  
H -4.215752 2.231647 -0.488735  
H -3.487669 -1.555084 1.411328  
H 1.783114 2.799622 -1.024488  
H 1.800296 -0.368643 1.901457  
O -6.837083 1.695448 -0.949756  
O -7.706612 -0.587556 -0.164621  
O -6.032818 -2.426250 1.105021  
O 4.505031 2.888930 -1.159396  
O 5.807052 1.157958 0.444984  
O 4.299532 -0.562242 2.121472  
C 3.865033 3.739621 -2.079143  
H 3.222492 3.176039 -2.775652  
H 3.255081 4.505906 -1.573954  
H 4.654127 4.237276 -2.651371  
C 6.587872 2.309294 0.723640  
H 6.684266 2.960978 -0.154478  
H 6.158659 2.892280 1.554216  
H 7.583122 1.954940 1.020243  
C 5.536691 -0.323138 2.765131  
H 5.631703 0.723171 3.091910  
H 5.548536 -0.967226 3.653129  
H 6.396017 -0.575745 2.128891  
C -5.178602 -3.363111 1.711746  
H -4.345139 -3.646315 1.047623  
H -4.766140 -2.987910 2.662412  
H -5.782611 -4.252515 1.916569  
C -8.521333 -1.364330 0.696981  
H -8.421133 -2.438841 0.498517  
H -8.291347 -1.172456 1.754235  
H -9.553184 -1.055728 0.494871  
C -6.426027 2.950077 -1.428535  
H -6.057446 3.599516 -0.616711  
H -5.639848 2.859425 -2.196283

H -7.306104 3.418198 -1.880257  
C 1.859493 -1.321727 -1.629938  
C 1.901197 -2.429218 -0.756678  
C 3.089103 -0.720053 -1.957351  
C 3.088525 -2.890751 -0.224061  
H 0.966943 -2.923493 -0.469153  
C 4.290722 -1.187399 -1.461456  
H 3.095822 0.141567 -2.632213  
C 4.325334 -2.275401 -0.554928  
H 3.064874 -3.737886 0.461088  
H 5.210075 -0.671029 -1.737993  
N 5.501503 -2.704571 -0.009789  
C 5.497960 -3.747399 0.986129  
H 6.513380 -3.891295 1.369147  
H 4.849576 -3.487118 1.839032  
H 5.154638 -4.715570 0.584159  
C 6.748030 -2.102466 -0.423301  
H 6.928747 -2.234965 -1.502759  
H 6.770804 -1.021231 -0.209703  
H 7.577176 -2.576606 0.111378

## TS3(1,2)

1 1  
N -0.801716 -1.715078 -0.291939  
C -0.055137 -2.478418 -1.040938  
C 1.396836 -2.213502 -1.008623  
N 1.809150 -1.219159 -0.268084  
C 3.157234 -0.799017 -0.240596  
C 3.823170 -0.463126 -1.415777  
C 3.794605 -0.667292 1.001488  
C 5.147061 0.002253 -1.380991  
C 5.113372 -0.219399 1.044766  
C 5.805210 0.135140 -0.142151  
C -2.191764 -1.830702 -0.188196  
C -2.827050 -3.064166 0.023956  
C -2.945562 -0.648679 -0.234521  
C -4.213978 -3.115422 0.161289  
C -4.338027 -0.699512 -0.137717  
C -4.997027 -1.938089 0.046753  
C -1.201963 0.505974 2.287858  
H -0.943446 0.605949 3.346267  
H -2.102192 1.078543 2.038899  
H -1.426160 -0.559089 2.098208

C 1.362626 1.359331 1.640548  
H 1.814874 1.172123 2.621901  
C 0.041940 1.944676 1.643301  
H -0.262297 2.438871 2.571108  
Pd 0.340861 -0.209946 0.847769  
C -0.569368 -3.520139 -1.977597  
H 0.006016 -3.524798 -2.912005  
H -0.485988 -4.535411 -1.558730  
H -1.625796 -3.355244 -2.218292  
C 2.306025 -3.104114 -1.785457  
H 1.978654 -4.149601 -1.713634  
H 2.312683 -2.853206 -2.857376  
H 3.340608 -3.032905 -1.432825  
H -2.231190 -3.970581 0.118909  
H -2.422127 0.302061 -0.363838  
H 3.239296 -0.909024 1.908017  
H 3.337775 -0.539521 -2.389519  
O -4.911307 -4.238065 0.397270  
O -6.314513 -2.103456 0.202986  
O -5.130297 0.394715 -0.177366  
O 5.812444 -0.040244 2.183515  
O 7.038043 0.684254 -0.101110  
O 5.666737 0.325510 -2.577740  
C 5.192114 -0.347824 3.407918  
H 4.305477 0.282220 3.584261  
H 4.893239 -1.407037 3.460089  
H 5.927688 -0.147686 4.192996  
C 8.083501 -0.003951 0.569043  
H 8.212403 0.361352 1.595824  
H 7.899913 -1.088377 0.596462  
H 9.005513 0.184208 0.002960  
C 7.063724 0.333521 -2.817814  
H 7.556635 -0.550098 -2.385263  
H 7.176069 0.299719 -3.907165  
H 7.546724 1.239863 -2.432455  
C -4.527765 1.654963 -0.332884  
H -3.847926 1.889713 0.504027  
H -3.954088 1.730988 -1.272233  
H -5.336774 2.393271 -0.348928  
C -7.263232 -1.285829 -0.462463  
H -7.473599 -0.365448 0.096812  
H -6.930479 -1.021880 -1.475554  
H -8.178810 -1.884040 -0.529534  
C -4.207097 -5.446835 0.526653

H -3.655021 -5.700910 -0.394087  
H -3.498677 -5.419394 1.370736  
H -4.951653 -6.225991 0.716148  
H 2.083799 1.676096 0.877585  
C -0.518369 2.623870 0.444955  
C -1.625832 3.456767 0.626656  
C 0.006624 2.433849 -0.842802  
C -2.262141 4.095819 -0.461035  
H -2.008614 3.594707 1.640541  
C -0.598918 3.077352 -1.919322  
H 0.879385 1.796044 -1.005626  
C -1.714790 3.887865 -1.748522  
H -0.190724 2.947371 -2.924204  
H -2.157583 4.370272 -2.620069  
N -3.382155 4.869033 -0.274234  
C -3.998773 5.521842 -1.403611  
H -4.880738 6.076724 -1.069173  
H -3.322721 6.237697 -1.901738  
H -4.333409 4.797444 -2.165172  
C -3.849798 5.147491 1.060637  
H -4.719249 5.810359 1.014354  
H -4.162996 4.233110 1.594152  
H -3.084618 5.645544 1.680304

## TS4

I 1

N 1.51572500 -1.33235600 -1.32004900  
C 1.19364200 -2.58110900 -1.48882600  
C -0.21930200 -2.95950600 -1.25592000  
N -1.02170300 -2.02308900 -0.85093200  
C -2.34576500 -2.31307700 -0.47521700  
C -2.59542800 -3.20180000 0.57968100  
C -3.40386100 -1.65964200 -1.11721600  
C -3.90965400 -3.45567600 0.97950600  
C -4.72431400 -1.93876300 -0.73837900  
C -4.99449800 -2.84353000 0.31019800  
C 2.86397500 -0.91955300 -1.38071600  
C 3.26337000 0.00889400 -2.34021600  
C 3.77303700 -1.40355500 -0.43389400  
C 4.59888800 0.43003700 -2.38649500  
C 5.08375900 -0.93018600 -0.43485700  
C 5.52319600 -0.01304000 -1.41659300

C -3.12389800 -0.20936300 2.46953900  
H -3.65643000 -0.80837300 1.71717200  
H -2.97808700 -0.84432200 3.35458700  
H -3.79481500 0.61140600 2.75705200  
C -1.93124200 0.96852300 0.58266800  
H -2.19361400 0.23765000 -0.19421400  
C -1.79481000 0.30179400 1.93530300  
H -1.08368700 -0.53975200 1.84761300  
H -1.33683500 0.99218200 2.66501300  
C -0.23615300 2.13089700 0.29519200  
H -0.74637800 2.82090500 -0.37999500  
H -0.33251400 2.43270400 1.34464700  
C 1.08604700 1.74550300 -0.14131900  
H 1.37983900 2.12979000 -1.12990900  
H 2.53156500 0.36940700 -3.06270400  
H 3.42590100 -2.09295600 0.33604500  
H -3.18573200 -0.96361300 -1.92827500  
H -1.75453100 -3.67672900 1.08576000  
O -5.80675400 -1.36942600 -1.30895500  
O -6.22460700 -3.11912500 0.77370700  
O -4.24712800 -4.26807200 1.99632100  
O 5.06985700 1.28505400 -3.32402900  
O 6.81092300 0.36752000 -1.31592200  
O 6.00247300 -1.25986600 0.49535400  
C -5.61711100 -0.46339400 -2.36612000  
H -5.06589100 0.43219300 -2.03723700  
H -5.08485300 -0.92568100 -3.21357200  
H -6.61384000 -0.15855500 -2.70070900  
C -7.28716700 -3.38235200 -0.12622500  
H -6.92744800 -3.86254200 -1.04794000  
H -7.96702900 -4.07141000 0.38899400  
H -7.83530400 -2.46899000 -0.39144600  
C -3.21784800 -4.88680300 2.72280000  
H -3.69821400 -5.48275200 3.50505700  
H -2.61128200 -5.55707900 2.09048100  
H -2.55010600 -4.14866500 3.19820400  
C 4.16335600 1.83914500 -4.24338100  
H 3.69878600 1.06785600 -4.87865000  
H 3.36560300 2.41089300 -3.73907100  
H 4.73731900 2.51986900 -4.87997500  
C 7.24612600 1.65051600 -1.72300000  
H 8.17848700 1.84065700 -1.17719300  
H 7.44750600 1.69679900 -2.80097100  
H 6.51685000 2.43383200 -1.46691700

C 5.62238900 -2.14507400 1.51624800  
H 4.76241100 -1.76228700 2.09350900  
H 5.36809400 -3.14237500 1.11962400  
H 6.48419100 -2.24218300 2.18596200  
C 2.15334700 -3.64100600 -1.91561400  
H 1.74884500 -4.21481800 -2.76002700  
H 3.12096200 -3.22463200 -2.21168100  
H 2.33482700 -4.37086300 -1.11164800  
C -0.62469000 -4.37240200 -1.51890900  
H -0.28918400 -4.69469600 -2.51407500  
H -0.16347300 -5.06963800 -0.80282500  
H -1.70943400 -4.50412800 -1.46106800  
C -2.86213800 2.09933700 0.45463200  
C -3.47853500 2.36646200 -0.77940000  
C -3.15339200 2.97889400 1.51121300  
C -4.36434900 3.41500200 -0.95415800  
H -3.23473700 1.72811500 -1.63667400  
C -4.04367200 4.02992700 1.36396600  
H -2.68196300 2.83131800 2.48773400  
C -4.68627700 4.27614300 0.12533600  
H -4.81585100 3.56901700 -1.93474800  
H -4.24513500 4.66953900 2.22323400  
C 2.21590400 1.53086500 0.75875100  
C 2.09346500 0.90612800 2.01544500  
C 3.50164000 1.96018700 0.38639700  
C 3.19070700 0.68036600 2.82999200  
H 1.10578000 0.57000800 2.35051000  
C 4.60657300 1.76155900 1.19301000  
H 3.63187400 2.47565800 -0.57090300  
C 4.49089700 1.08323600 2.42902100  
H 3.04347400 0.18106200 3.78870000  
H 5.57974400 2.11754500 0.85497200  
N -5.57761700 5.30450500 -0.02532500  
N 5.59378100 0.81937200 3.19919200  
Pd 0.01870800 0.00326000 -0.52330700  
C 6.90639700 1.19169700 2.72481800  
H 7.66714800 0.78575600 3.39950600  
H 7.09430900 0.78167200 1.72013500  
H 7.04726000 2.28599700 2.68117700  
C 5.43689900 0.24858800 4.51316400  
H 4.78726400 0.86158000 5.15993100  
H 5.00574700 -0.76763800 4.48227800  
H 6.41395600 0.17553400 5.00120800  
C -6.19985700 5.53801700 -1.30487100

H -6.80068100 4.67576300 -1.63977700  
H -6.87140300 6.39900900 -1.23413800  
H -5.46175000 5.75705900 -2.09453000  
C -5.88637500 6.16230200 1.09283400  
H -6.30015900 5.59765900 1.94448600  
H -5.00190400 6.71241900 1.45556700  
H -6.63512500 6.90101900 0.79151700

## TS5

I 1

N 1.71179600 -2.06345700 -0.63757300  
C 1.35394100 -3.19637500 -0.11594000  
C -0.10810700 -3.43268800 -0.05172300  
N -0.85620800 -2.37864500 -0.17076300  
C -2.25673900 -2.39286800 -0.14003800  
C -2.98070500 -2.98453700 0.90525700  
C -2.91917700 -1.68455400 -1.15167500  
C -4.37650500 -2.84803400 0.94426800  
C -4.30959000 -1.57734700 -1.12571800  
C -5.04903300 -2.12298000 -0.05772200  
C 3.04041200 -1.62995400 -0.73733100  
C 3.49616700 -1.20336900 -1.98810300  
C 3.86827500 -1.51860100 0.38771800  
C 4.79291600 -0.70476000 -2.13480800  
C 5.13223500 -0.94411300 0.25582100  
C 5.62238700 -0.53821800 -1.00616300  
C -2.52030600 -0.26777400 3.74092300  
H -3.03642800 -1.20953100 3.50374300  
H -1.72508900 -0.49131100 4.46361700  
H -3.24954200 0.38877400 4.23460300  
C -3.00324700 0.56299300 1.46013700  
H -3.51605200 -0.35197300 1.14325500  
C -1.94876800 0.37350100 2.47853600  
H -1.18101000 -0.29718500 2.05084800  
H -1.43302700 1.31493200 2.72163300  
C -0.53784400 1.53374000 -0.61899800  
H -1.32731400 1.73759400 -1.35355800  
H -0.79246800 1.85883500 0.39562500  
C 0.82353500 1.54581800 -1.03097000  
H 1.04598900 1.67779100 -2.09882000  
H 2.82385600 -1.28515200 -2.84141900  
H 3.48294300 -1.80313600 1.36666500  
H -2.31335000 -1.20764000 -1.92394800

H -2.44998200 -3.50651800 1.70171400  
O -5.03477400 -0.90579800 -2.04888500  
O -6.37926200 -1.88366100 0.04904800  
O -5.15946900 -3.35682700 1.91659100  
O 5.30949400 -0.33341100 -3.33191700  
O 6.85941300 0.00085900 -0.99697000  
O 5.96078500 -0.70202100 1.29416200  
C -4.33758900 -0.27896900 -3.09885800  
H -3.63493900 0.48466200 -2.72335800  
H -3.77539400 -1.00468100 -3.70785300  
H -5.08912800 0.20569400 -3.73073800  
C -7.21580500 -2.76625200 -0.67591800  
H -7.10422300 -3.80373500 -0.32211900  
H -8.24894900 -2.44577500 -0.50380800  
H -7.00640000 -2.72798900 -1.75666500  
C -4.56062600 -4.15587300 2.905485  
H -5.36654700 -4.50927800 3.556160  
H -4.04493000 -5.02821100 2.4710180  
H -3.8393720 -3.58859800 3.51685100  
C 4.48154900 -0.40114500 -4.46427400  
H 4.15162900 -1.43216500 -4.67088600  
H 3.58962800 0.23999100 -4.36055900  
H 5.07679200 -0.04539400 -5.31142700  
C 7.27598100 0.94180900 -1.96628700  
H 8.12547900 1.47557600 -1.52208200  
H 7.60267000 0.46102500 -2.89738800  
H 6.48385000 1.66686700 -2.20742900  
C 5.50819500 -1.01240700 2.58424300  
H 4.57181000 -0.48033800 2.82948700  
H 5.34294200 -2.09545000 2.71324600  
H 6.29236100 -0.69237300 3.27985400  
C 2.28848200 -4.25846800 0.36145500  
H 1.99436100 -5.24850600 -0.01123600  
H 3.31956200 -4.06163000 0.04643900  
H 2.28603200 -4.33400300 1.46055600  
C -0.60110500 -4.83688900 0.07496100  
H -0.066697 -5.50149600 -0.61819500  
H -0.423410 -5.24111700 1.08402300  
H -1.67363100 -4.91552600 -0.13192700  
C -3.5132880 1.74792400 0.95608100  
C -4.635269 1.71024600 0.06297400  
C -2.979516 3.04272100 1.26088400  
C -5.16455200 2.84691000 -0.484172  
H -5.08608000 0.74314600 -0.175764

C -3.504973 4.18469700 0.718986  
H -2.12967900 3.12800800 1.941230  
C -4.61629500 4.13029800 -0.17724700  
H -6.02223100 2.76170900 -1.15094100  
H -3.06209600 5.14532900 0.9791750  
C 1.96091100 1.79159900 -0.14151600  
C 1.85426500 1.78995500 1.26598200  
C 3.24812500 2.01608200 -0.66745400  
C 2.94949100 1.98424000 2.09093100  
H 0.8778760 1.61838100 1.72842900  
C 4.3547930 2.21204300 0.14143000  
H 3.37947300 2.03528700 -1.75462600  
C 4.24364100 2.18674800 1.55046800  
H 2.80320100 1.97180500 3.17206300  
H 5.32638700 2.38039000 -0.32281300  
N -5.13626600 5.25906000 -0.71214700  
N 5.34401200 2.34690800 2.35783700  
Pd 0.19129000-0.42123600 -0.6802270  
C 6.65646800 2.47864400 1.7696020  
H 7.41147800 2.48328900 2.5627740  
H 6.8779580 1.63126100 1.10138100  
H 6.7712590 3.41513400 1.19479800  
C 5.17721800 2.48358000 3.78138700  
H 4.5142060 3.32481700 4.04644900  
H 4.7541770 1.57586000 4.24700700  
H 6.1495810 2.66806200 4.24922300  
C -6.2720340 5.19054000 -1.6108530  
H -7.150142 4.74224200 -1.12268700  
H -6.543699 6.19976200 -1.93053100  
H -6.0429000 4.60106700 -2.51106700  
C -4.573148 6.55522800 -0.38715100  
H -4.640263 6.76953600 0.6899290  
H -3.516655 6.62523000 -0.68556900  
H -5.12463500 7.33444600 -0.91929500

## IM-1

1 1

C 4.84928400-0.21669100 0.61477000  
H 4.52011500-0.32596400 1.65593500  
H 5.65670500-0.93714500 0.44172500  
H 5.27283300 0.78984900 0.50015300  
C 2.62853500 0.53784300-0.25208200  
H 2.95987300 1.58567900-0.24527000

C 3.70276600-0.45998900-0.36085500  
H 3.32120800-1.48763500-0.28275900  
H 4.09842600-0.37051600-1.39220800  
C 1.26804400 0.33320200-0.16478600  
C 0.38133600 1.46343800 0.09138900  
C 0.66088300-0.97019900-0.14646400  
C-0.97106300 1.31825400-0.01509600  
H 0.81454500 2.46647400-0.10065500  
C-0.69003300-1.12794800-0.07091600  
H 1.29338600-1.85821300-0.19285800  
C-1.56343900 0.01131000-0.00347600  
H-1.60130300 2.20455000 0.03680800  
H-1.10711300-2.13375400-0.05842000  
N-2.89157200-0.14368100 0.07065500  
C-3.48961800-1.47207700 0.08031500  
H-4.57588900-1.37787200 0.13999700  
H-3.24531100-2.02609300-0.83625300  
H-3.15001400-2.05629500 0.94649900  
C-3.77270800 1.01405600 0.14371500  
H-3.56221500 1.61918500 1.03611800  
H-3.66873700 1.65060500-0.74563600  
H-4.80941800 0.67572100 0.19982000

## IM-2

1 1

C 2.31572400 -0.63663200 0.07199600  
C 2.59693000 0.71251700 0.31929800  
C 3.88002100 1.22785800 0.20270000  
C 4.96486600 0.39969000 -0.17623600  
C 4.67890800 -0.96252500 -0.42650700  
C 3.38530000 -1.45363800 -0.30376400  
H 1.79611600 1.39289200 0.62367900  
H 4.04217900 2.28315000 0.41274100  
H 5.47325300 -1.64807600 -0.71443400  
H 3.20801400 -2.51440600 -0.50025900  
C 0.91489200 -1.18836400 0.19724500  
N 6.23554500 0.89680600 -0.29188500  
C 0.02791100 -0.62227300 -0.96288400  
C -1.30040700 -1.25931800 -0.99577300  
H -0.02390200 0.47102100 -0.87645800  
H -1.29990700 -2.33111300 -1.23281200  
H 0.54461100 -0.86155800 -1.90616600

C -2.52582300 -0.69950900 -0.72925300  
C -3.71217000 -1.51664500 -0.79074300  
C -2.70442600 0.68652300 -0.37391800  
C -4.94907700 -1.01713100 -0.53087400  
H -3.60364700 -2.57025000 -1.05682400  
C -3.93329100 1.20133200 -0.10697400  
H -1.83355700 1.33943500 -0.31327000  
C -5.11381200 0.37126000 -0.17578100  
H -5.81412400 -1.67271600 -0.59181100  
H -4.02265500 2.25157100 0.15956400  
N -6.31629800 0.87375900 0.08085000  
C 7.31835400 0.01743800 -0.66967100  
H 7.15146300 -0.43298000 -1.66250600  
H 8.25061400 0.59029800 -0.71138200  
H 7.45394700 -0.80174300 0.05660900  
C 6.49064500 2.29137300 -0.01391000  
H 5.92282900 2.95407400 -0.68862300  
H 6.22858400 2.55791600 1.02410400  
H 7.55634100 2.49857400 -0.15668400  
C -6.47871400 2.28280100 0.43865500  
H -7.53953500 2.48596900 0.60534200  
H -5.92928100 2.51663900 1.36110000  
H -6.12148800 2.93415000 -0.37102000  
C -7.50853500 0.02930400 0.00999200  
H -7.63874700 -0.37636100 -1.00296700  
H -7.44046900 -0.80093900 0.72657900  
H -8.38557000 0.63208000 0.25871700  
C 0.27301300 -0.91402000 1.56329200  
H 0.12460400 0.17421100 1.68208200  
H -0.73562000 -1.36206800 1.58383400  
H 0.97446300 -2.28178500 0.06167800  
C 1.09617100 -1.45491200 2.72573600  
H 1.26428300 -2.53665600 2.61532100  
H 2.07954000 -0.96758100 2.77254500  
H 0.58405800 -1.28848000 3.68281700

## IM-3

1 1

C -1.52112200 -1.57525300 -0.48966600  
C -1.56081600 -2.80248700 0.18252200  
C -2.72000700 -3.56250000 0.25469900  
C -3.91832400 -3.11959900 -0.35629900  
C -3.87636900 -1.87955500 -1.03528200

C -2.70273900 -1.13836500 -1.09549900  
H -0.66367000 -3.18527100 0.67788800  
H -2.69480600 -4.50729800 0.79393900  
H -4.76845800 -1.48641600 -1.51872600  
H -2.71238600 -0.17711400 -1.61638800  
C -0.25799000 -0.75118400 -0.56736900  
N -5.06904300 -3.86049700 -0.29008300  
C 0.78506500 -1.47635600 -1.49090600  
C 1.92097900 -0.59088900 -1.79412900  
H 1.08963900 -2.42176300 -1.02285500  
H 1.69427400 0.25378800 -2.45701000  
H 0.26656000 -1.71143500 -2.43274800  
C 3.20428400 -0.65126700 -1.30566300  
C 4.16422600 0.35102300 -1.69154000  
C 3.65461500 -1.67232300 -0.39413300  
C 5.44215900 0.34514900 -1.22689100  
H 3.84602600 1.13680400 -2.37994000  
C 4.92661400 -1.68968900 0.08498800  
H 2.95781400 -2.44717200 -0.07379900  
C 5.87982800 -0.68098500 -0.31350600  
H 6.13119000 1.12234300 -1.54777500  
H 5.22389800 -2.47602200 0.77438700  
N 7.12579700 -0.69925200 0.14958400  
C -6.27308900 -3.37332800 -0.92247600  
H -6.13968500 -3.24101100 -2.00941700  
H -7.08060400 -4.09644200 -0.76694900  
H -6.59592600 -2.40642700 -0.50047100  
C -5.07499200 -5.11807300 0.42056100  
H -4.36286700 -5.83901000 -0.01555800  
H -4.81770000 -4.98908300 1.48560900  
H -6.07611900 -5.55848000 0.36637700  
C 7.56361100 -1.74026700 1.07849400  
H 8.61221100 -1.56873100 1.33448100  
H 6.96987300 -1.71321900 2.00278400  
H 7.47437600 -2.73509000 0.62020900  
C 8.08848800 0.32204300 -0.26017300  
H 8.23815200 0.30215600 -1.34869100  
H 7.74683300 1.32272700 0.03934700  
H 9.04669500 0.12202500 0.22596900  
C 0.34614700 -0.44094500 0.80597400  
H -0.51565200 0.20576800 -1.04891100  
C -0.61513300 0.30360900 1.74464700  
H -1.48036900 -0.35593300 1.92569700  
H 0.66947400 -1.37975100 1.29175600

H 1.25720100 0.17151000 0.67942500  
C -1.14178600 1.56814000 1.09576700  
C -2.49985100 1.73371600 0.81266100  
C -0.28752700 2.61892900 0.74189100  
C -2.99323100 2.88327500 0.20326300  
H -3.19870700 0.93511200 1.07587500  
C -0.75478700 3.77769700 0.13249000  
H 0.78309400 2.54304900 0.95604000  
C -2.12987800 3.94158800 -0.15690400  
H -4.06277600 2.95768200 0.01583600  
H -0.04568000 4.56746800 -0.10925700  
C 0.05666700 0.57394500 3.09850100  
H 0.43691000 -0.38130600 3.49820800  
H 0.94171300 1.21470100 2.93978000  
N -2.60484600 5.08329800 -0.75761000  
C -4.02298900 5.23570100 -0.98056600  
H -4.21180600 6.20196800 -1.46059400  
H -4.41813200 4.44697100 -1.64257000  
H -4.59743600 5.20362100 -0.03831500  
C -1.70064800 6.16968200 -1.04638600  
H -0.90500200 5.86398200 -1.74703200  
H -2.25777700 6.99020500 -1.51126400  
H -1.21480200 6.56051800 -0.13501100  
C -0.87584200 1.22450400 4.11231400  
H -0.37468800 1.37197700 5.07866800  
H -1.22365100 2.20403600 3.75449400  
H -1.76397100 0.59809900 4.28496800

## References

- (1) Liao, G.; Xiao, Z.; Chen, X.; Du, C.; Zhong, L.; Cheung, C. S.; Gao, H. Fast and regioselective polymerization of *para*-alkoxystyrene by palladium catalysts for precision production of high-molecular-weight polystyrene derivatives. *Macromolecules* **2020**, *53*, 256-266.
- (2) Xiao, Z.; Zheng, H.; Du, C.; Zhong, L.; Liao, H.; Gao, J.; Gao, H.; Wu, Q. Enhancement on alternating copolymerization of carbon monoxide and styrene by dibenzobarrelene-based  $\alpha$ -diimine palladium catalysts. *Macromolecules* **2018**, *51*, 9110-9121.
- (3) Pei, L.; Liu, F.; Liao, H.; Gao, J.; Zhong, L.; Gao, H.; Wu, Q. Synthesis of polyethylenes with controlled branching with  $\alpha$ -diimine nickel catalysts and revisiting formation of long-chain branching. *ACS Catal.* **2018**, *8*, 1104-1113.
- (4) Rix, F. C.; Brookhart, M.; White, P. S. Electronic effects on the  $\beta$ -Alkyl migratory insertion reaction of *para*-substituted styrene methyl palladium complexes. *J. Am. Chem. Soc.* **1996**, *118*, 2436-2448.
- (5) Sham, L. J.; Kohn, W. Self-consistent equations including exchange and correlation effects. *Physical Review* **1965**, *140*, A1133-A1138.
- (6) Kohn, W.; Hohenberg, P. Inhomogeneous electron gas. *Physical Review* **1964**, *136*, B864-B871.
- (7) Frisch, M. J.; Trucks, G. W.; Schlegel, H. B.; Scuseria, G. E.; Robb, M. A.; Cheeseman, J. R.; Scalmani, G.; Barone, V.; Petersson, G. A.; Nakatsuji, H.; Li, X.; Caricato, M.; Marenich, A. V.; Bloino, J.; Janesko, B. G.; Gomperts, R.; Mennucci, B.; Hratchian, H. P.; Ortiz, J. V.; Izmaylov, A. F.; Sonnenberg, J. L.; Williams; Ding, F.; Lipparini, F.; Egidi, F.; Goings, J.; Peng, B.; Petrone, A.; Henderson, T.; Ranasinghe, D.; Zakrzewski, V. G.; Gao, J.; Rega, N.; Zheng, G.; Liang, W.; Hada, M.; Ehara, M.; Toyota, K.; Fukuda, R.; Hasegawa, J.; Ishida, M.; Nakajima, T.; Honda, Y.; Kitao, O.; Nakai, H.; Vreven, T.; Throssell, K.; Montgomery Jr., J. A.; Peralta, J. E.; Ogliaro, F.; Bearpark, M. J.; Heyd, J. J.; Brothers, E. N.; Kudin, K. N.; Staroverov, V. N.; Keith, T. A.; Kobayashi, R.; Normand, J.; Raghavachari, K.; Rendell, A. P.; Burant, J. C.;



Iyengar, S. S.; Tomasi, J.; Cossi, M.; Millam, J. M.; Klene, M.; Adamo, C.; Cammi, R.; Ochterski, J. W.; Martin, R. L.; Morokuma, K.; Farkas, O.; Foresman, J. B.; Fox, D. J. *Gaussian 16 Rev. C.01*, Wallingford, CT, **2016**.

(8) Zhao, Y.; Truhlar, D. G. A new local density functional for main-group thermochemistry, transition metal bonding, thermochemical kinetics, and noncovalent interactions. *J. Chem. Phys.* **2006**, *125*, 194101.

(9) Weigend, F.; Ahlrichs, R. Balanced basis sets of split valence, triple zeta valence and quadruple zeta valence quality for H to Rn: Design and assessment of accuracy. *Phys. Chem. Chem. Phys.* **2005**, *7*, 3297-3305.
